# Supplementary material (part 2 of 2)
Source: publisher figshare collection journal article supplement (https://rs.figshare.com/ndownloader/files/36493543)

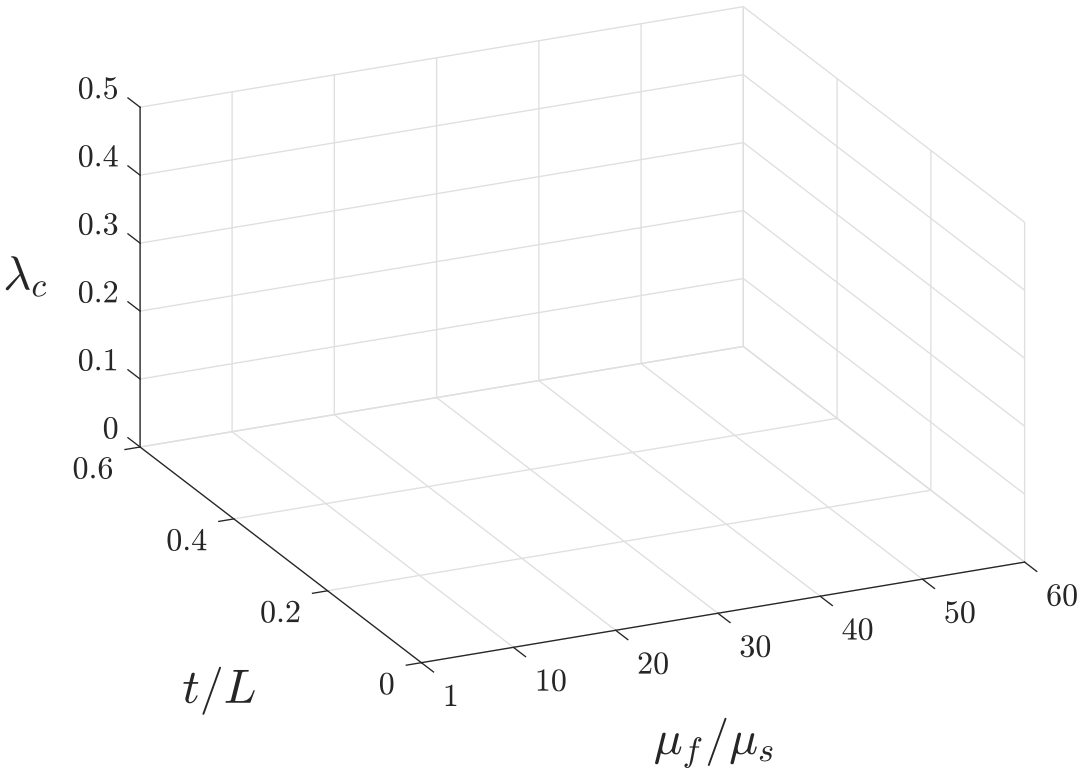

Supplement: Supplementary file 101 [file 36493543]

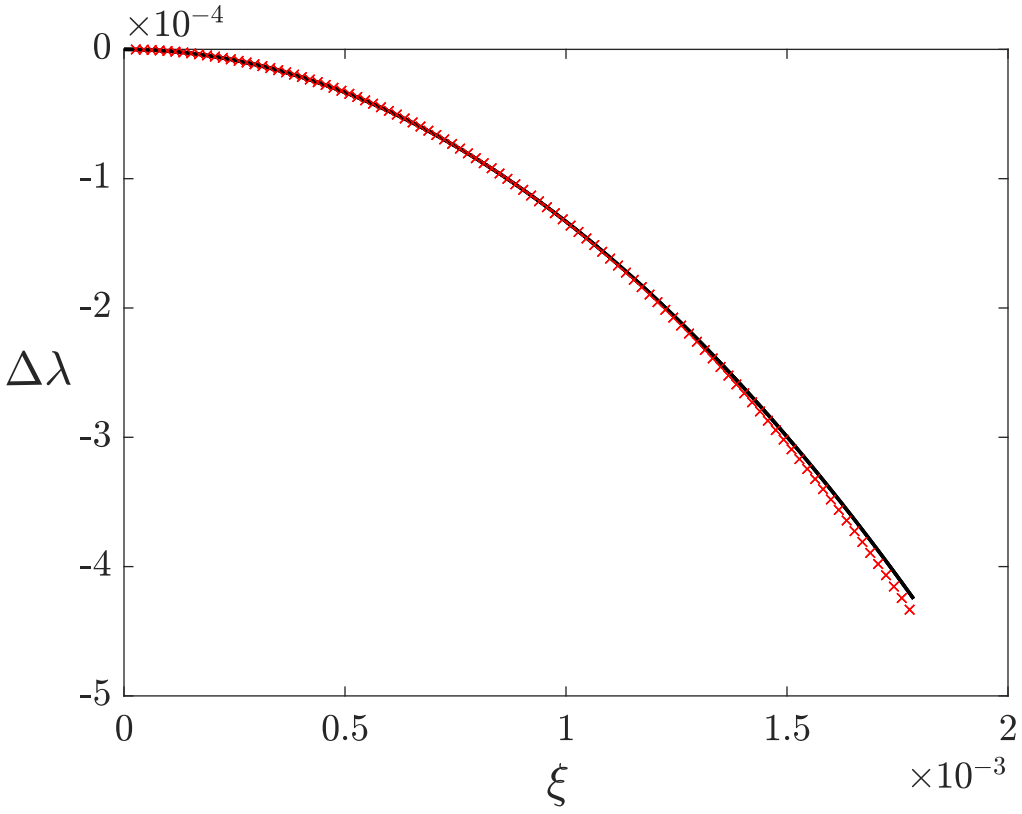

Supplement: Supplementary file 102 [file 36493543]

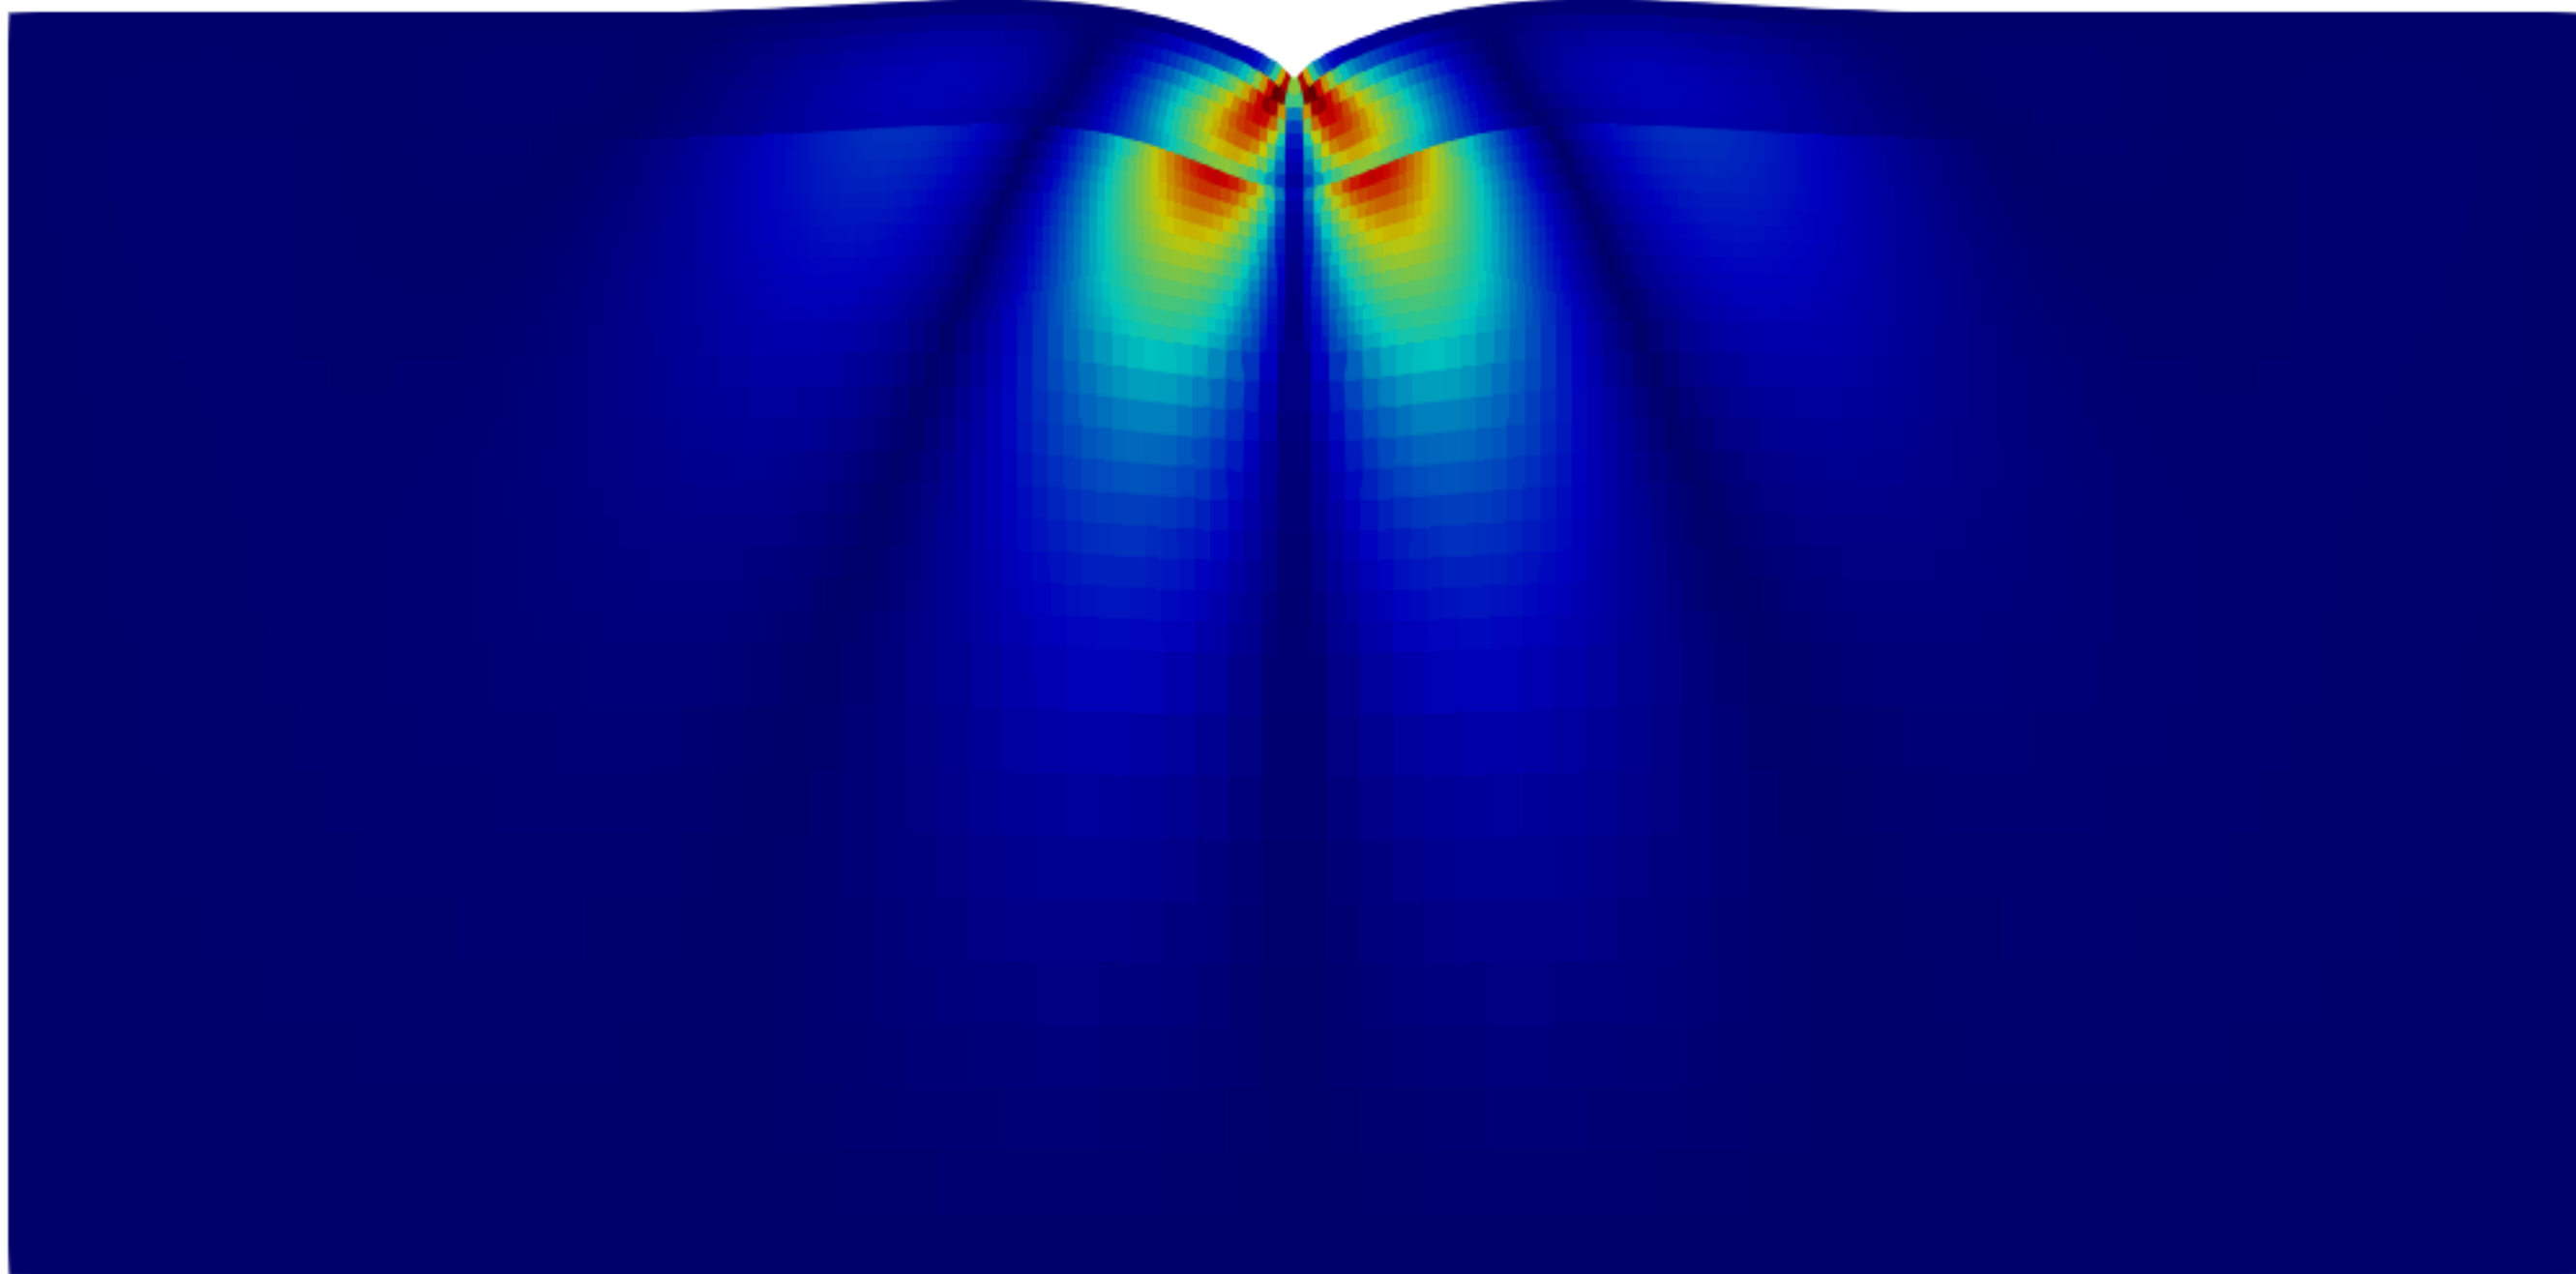

Supplement: Supplementary file 103 [file 36493543]

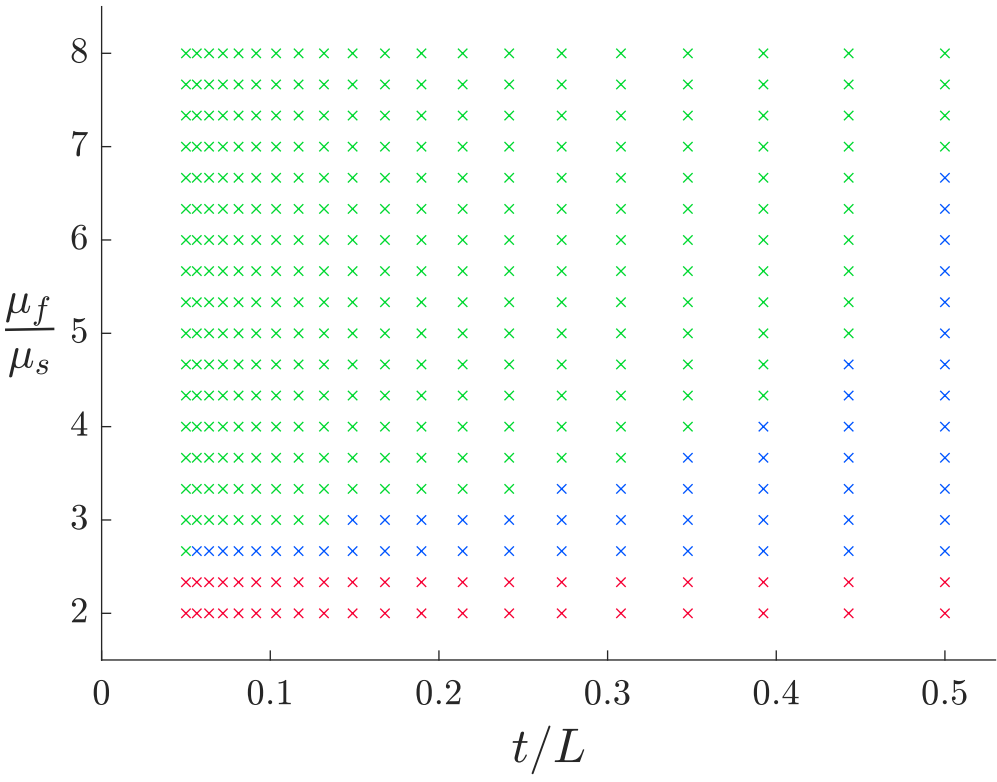

Supplement: Supplementary file 104 [file 36493543]

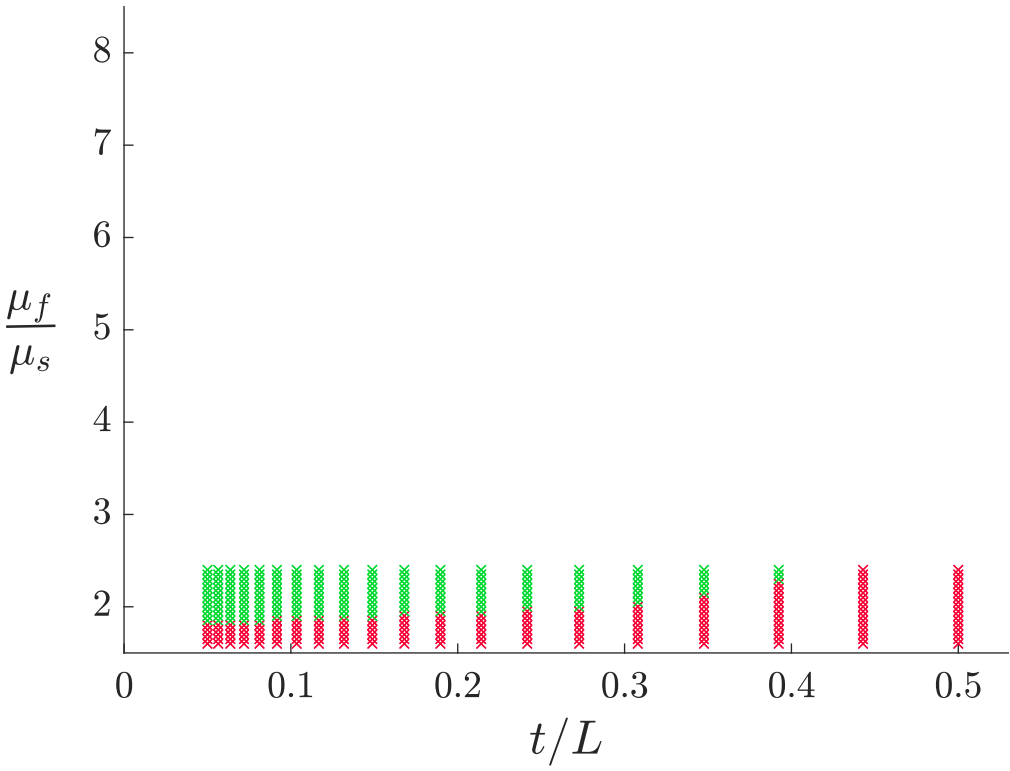

Supplement: Supplementary file 105 [file 36493543]

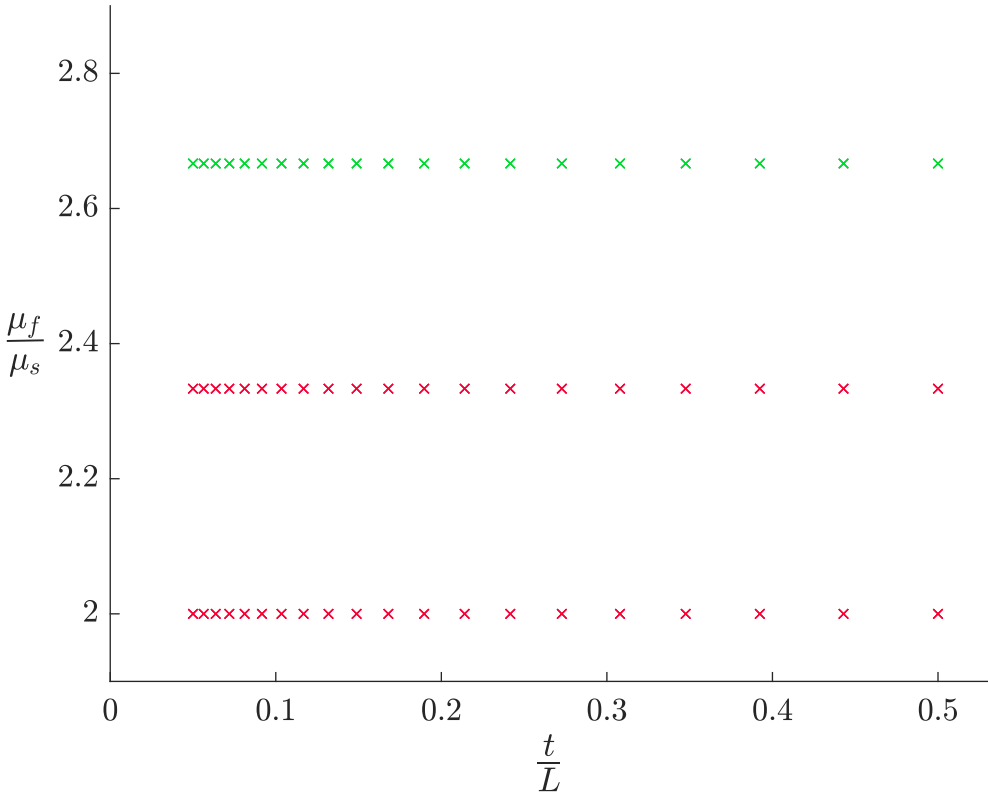

Supplement: Supplementary file 106 [file 36493543]

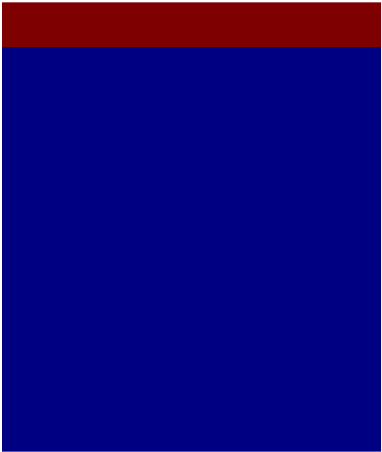

Supplement: Supplementary file 107 [file 36493543]

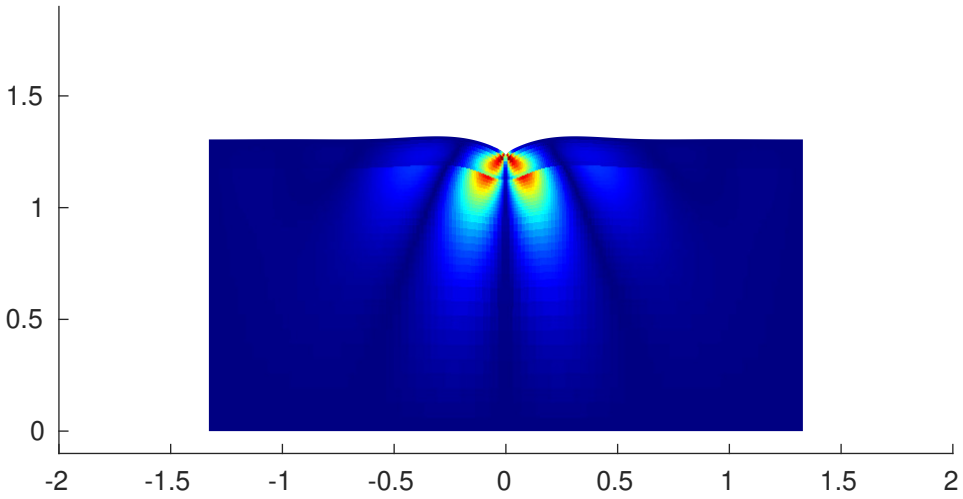

Supplement: Supplementary file 108 [file 36493543]

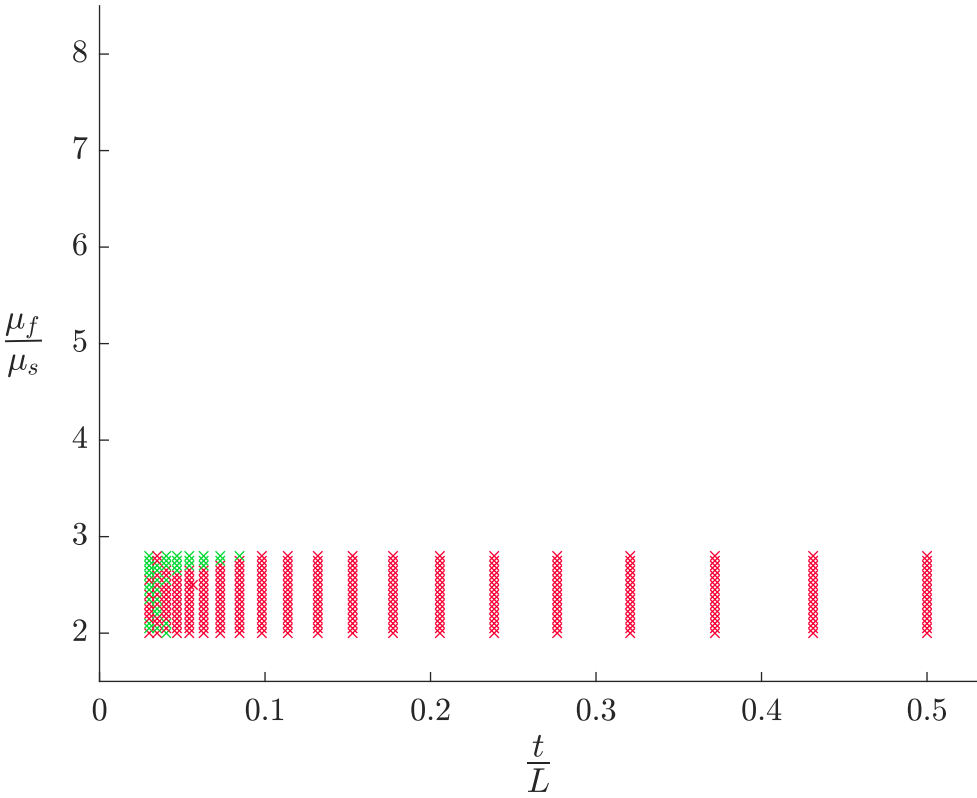

Supplement: Supplementary file 109 [file 36493543]

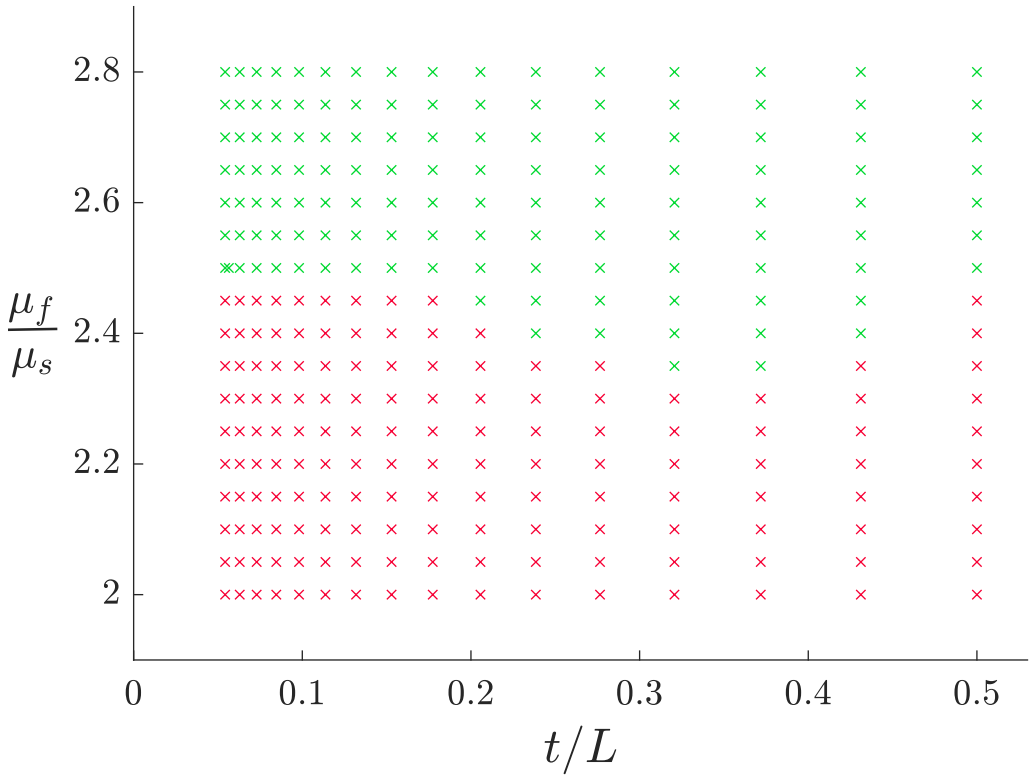

Supplement: Supplementary file 110 [file 36493543]

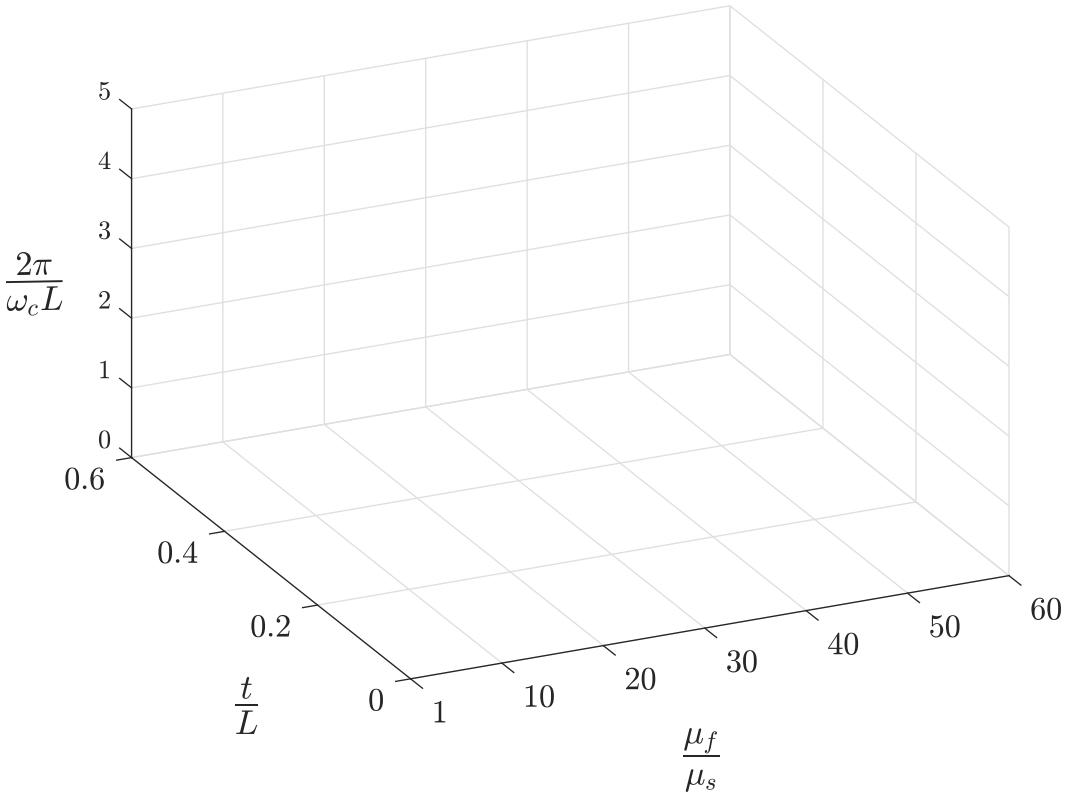

Supplement: Supplementary file 111 [file 36493543]

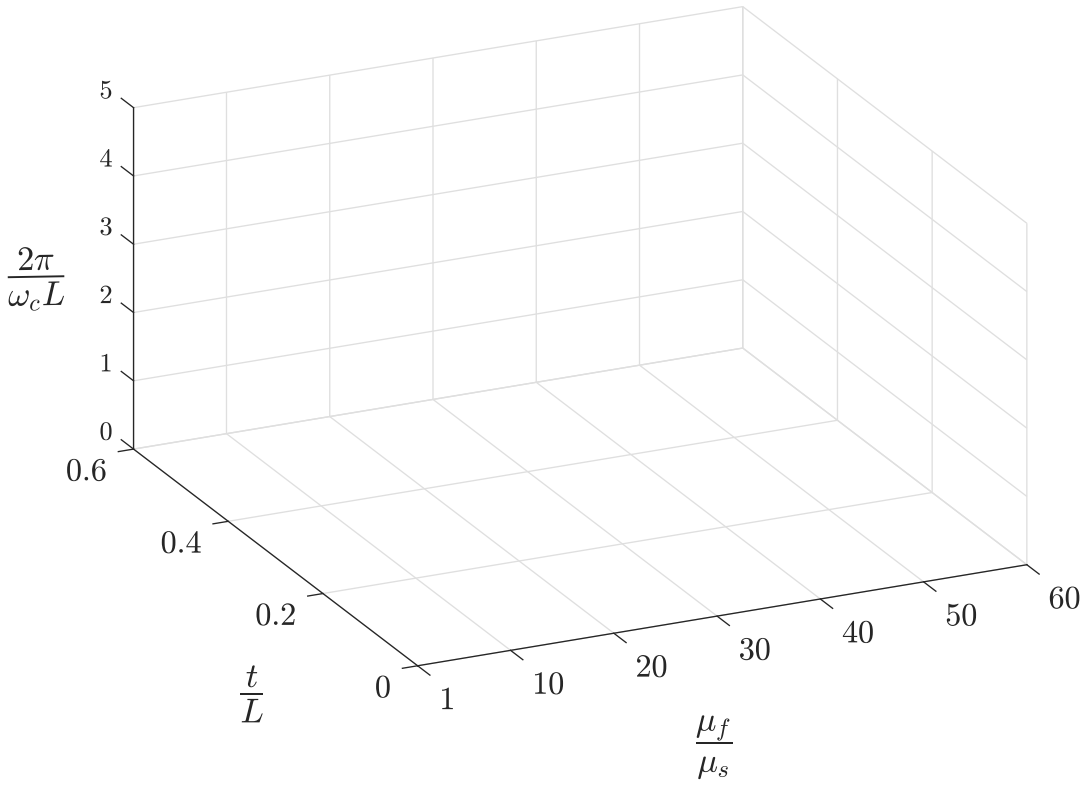

Supplement: Supplementary file 113 [file 36493543]

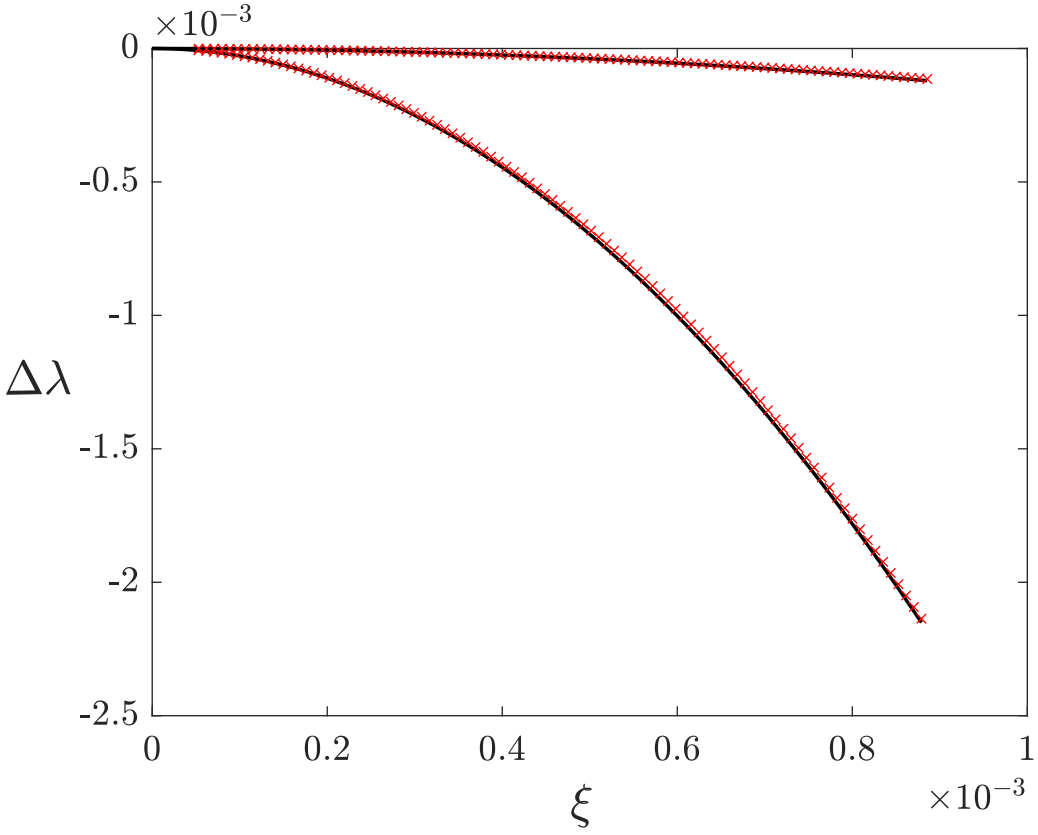

Supplement: Supplementary file 114 [file 36493543]

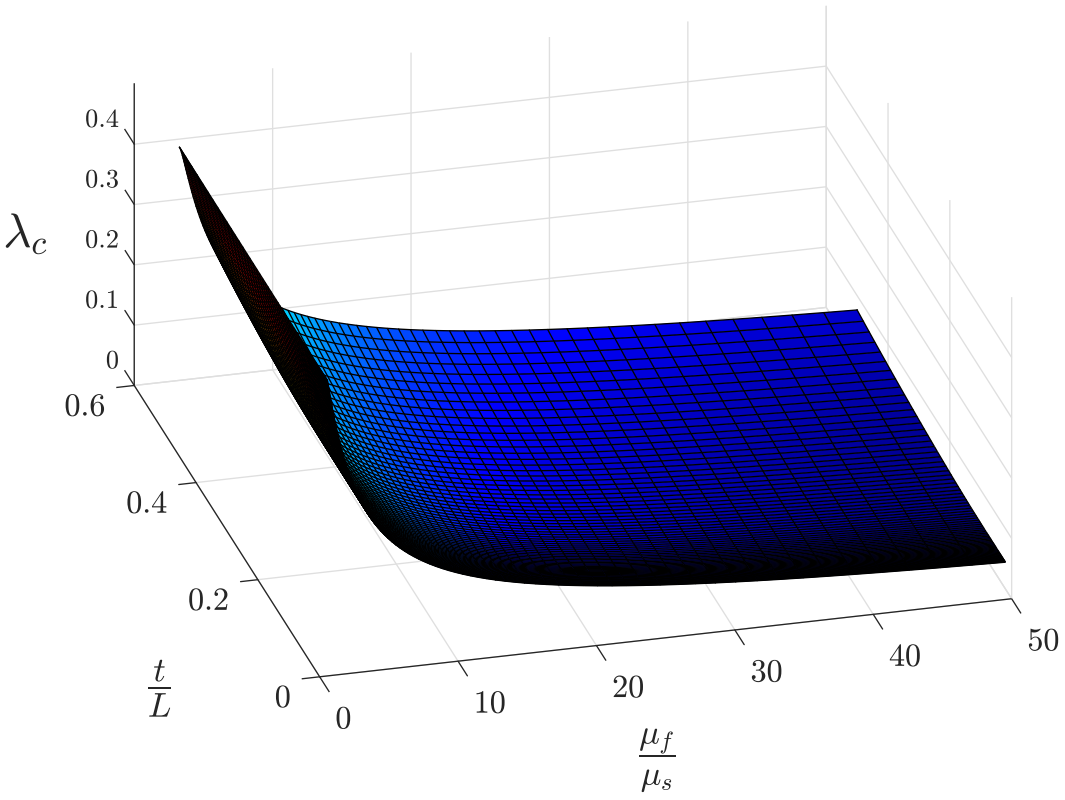

Supplement: Supplementary file 115 [file 36493543]

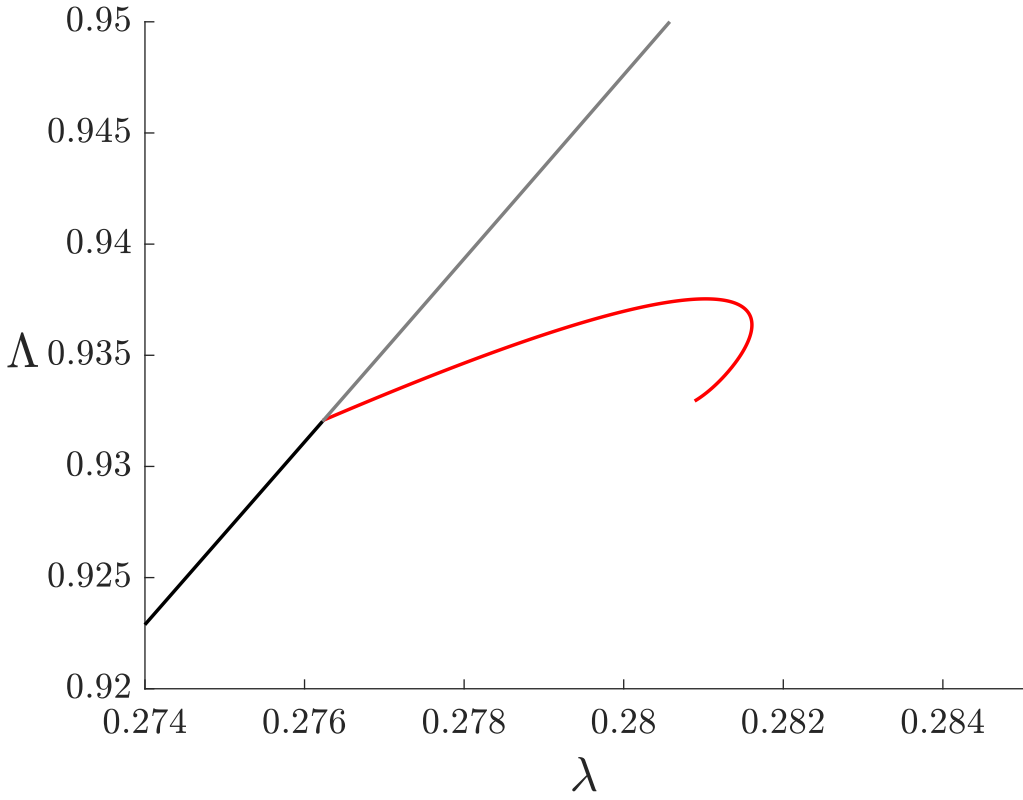

Supplement: Supplementary file 116 [file 36493543]

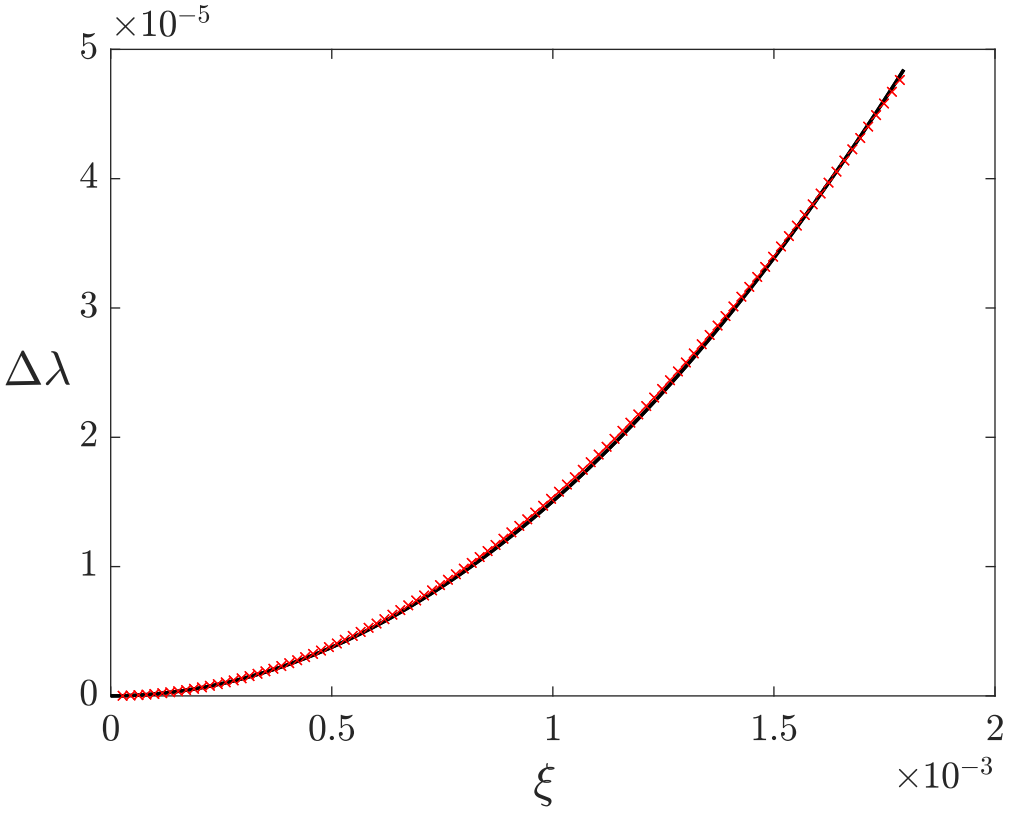

Supplement: Supplementary file 117 [file 36493543]

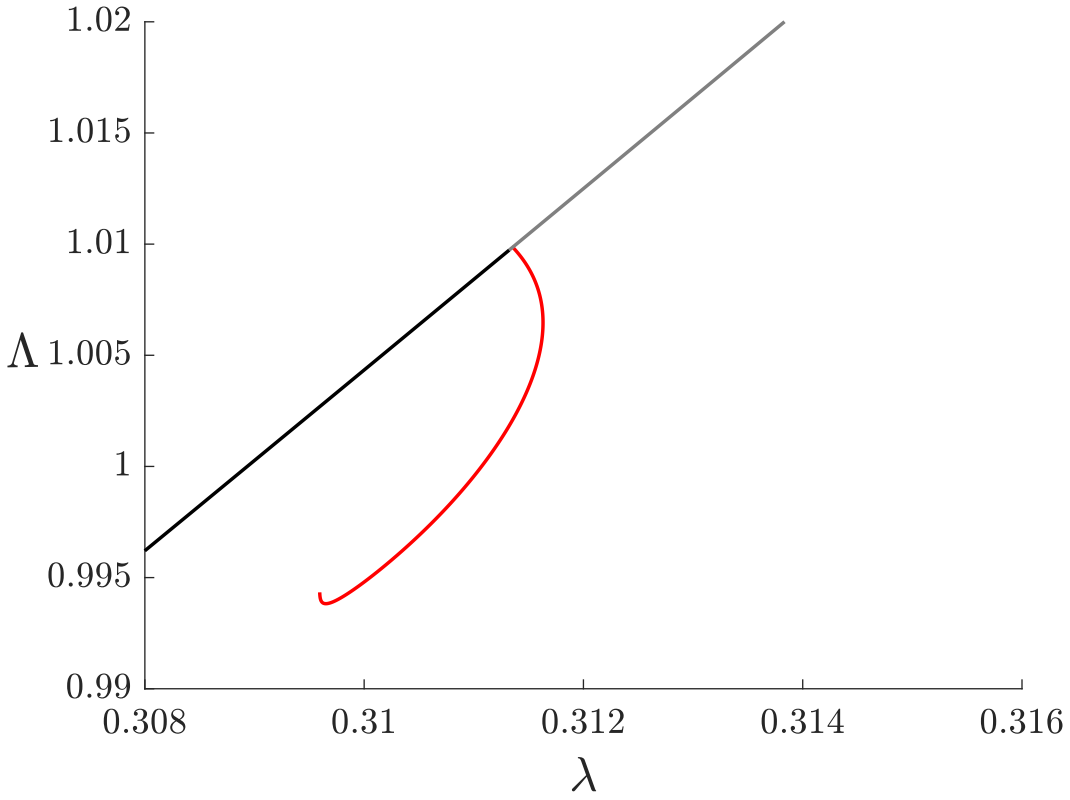

Supplement: Supplementary file 118 [file 36493543]

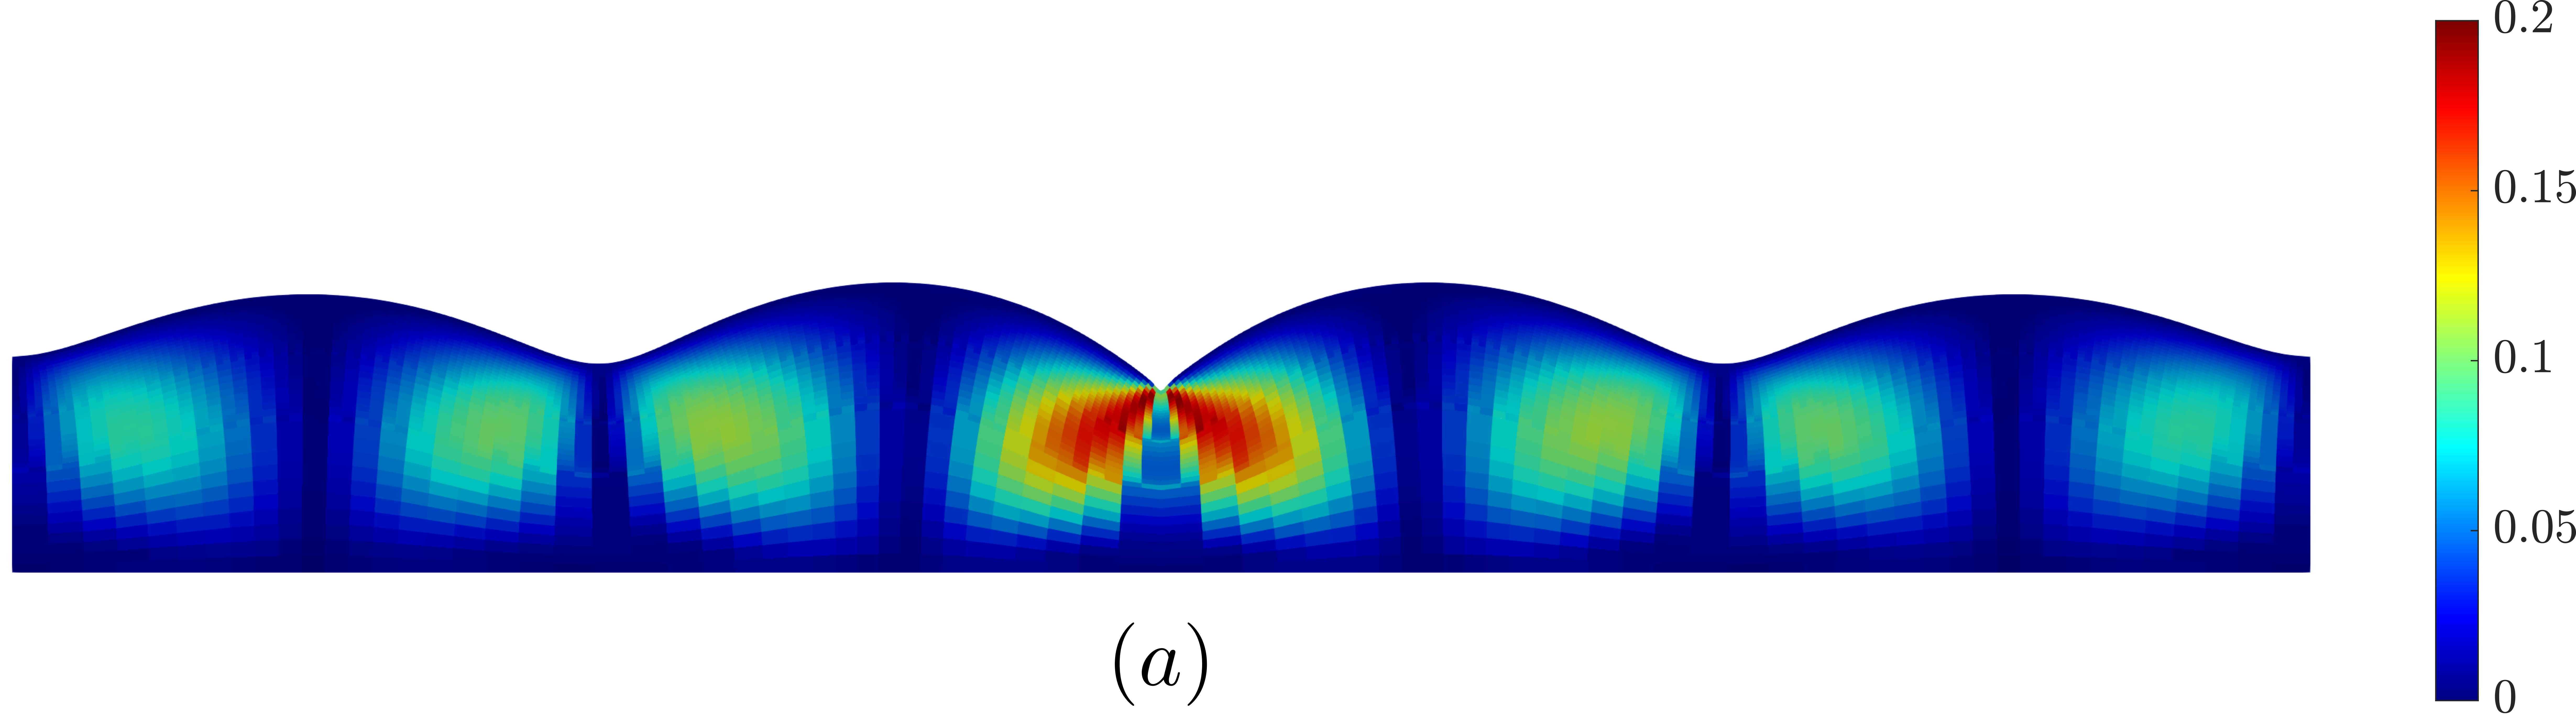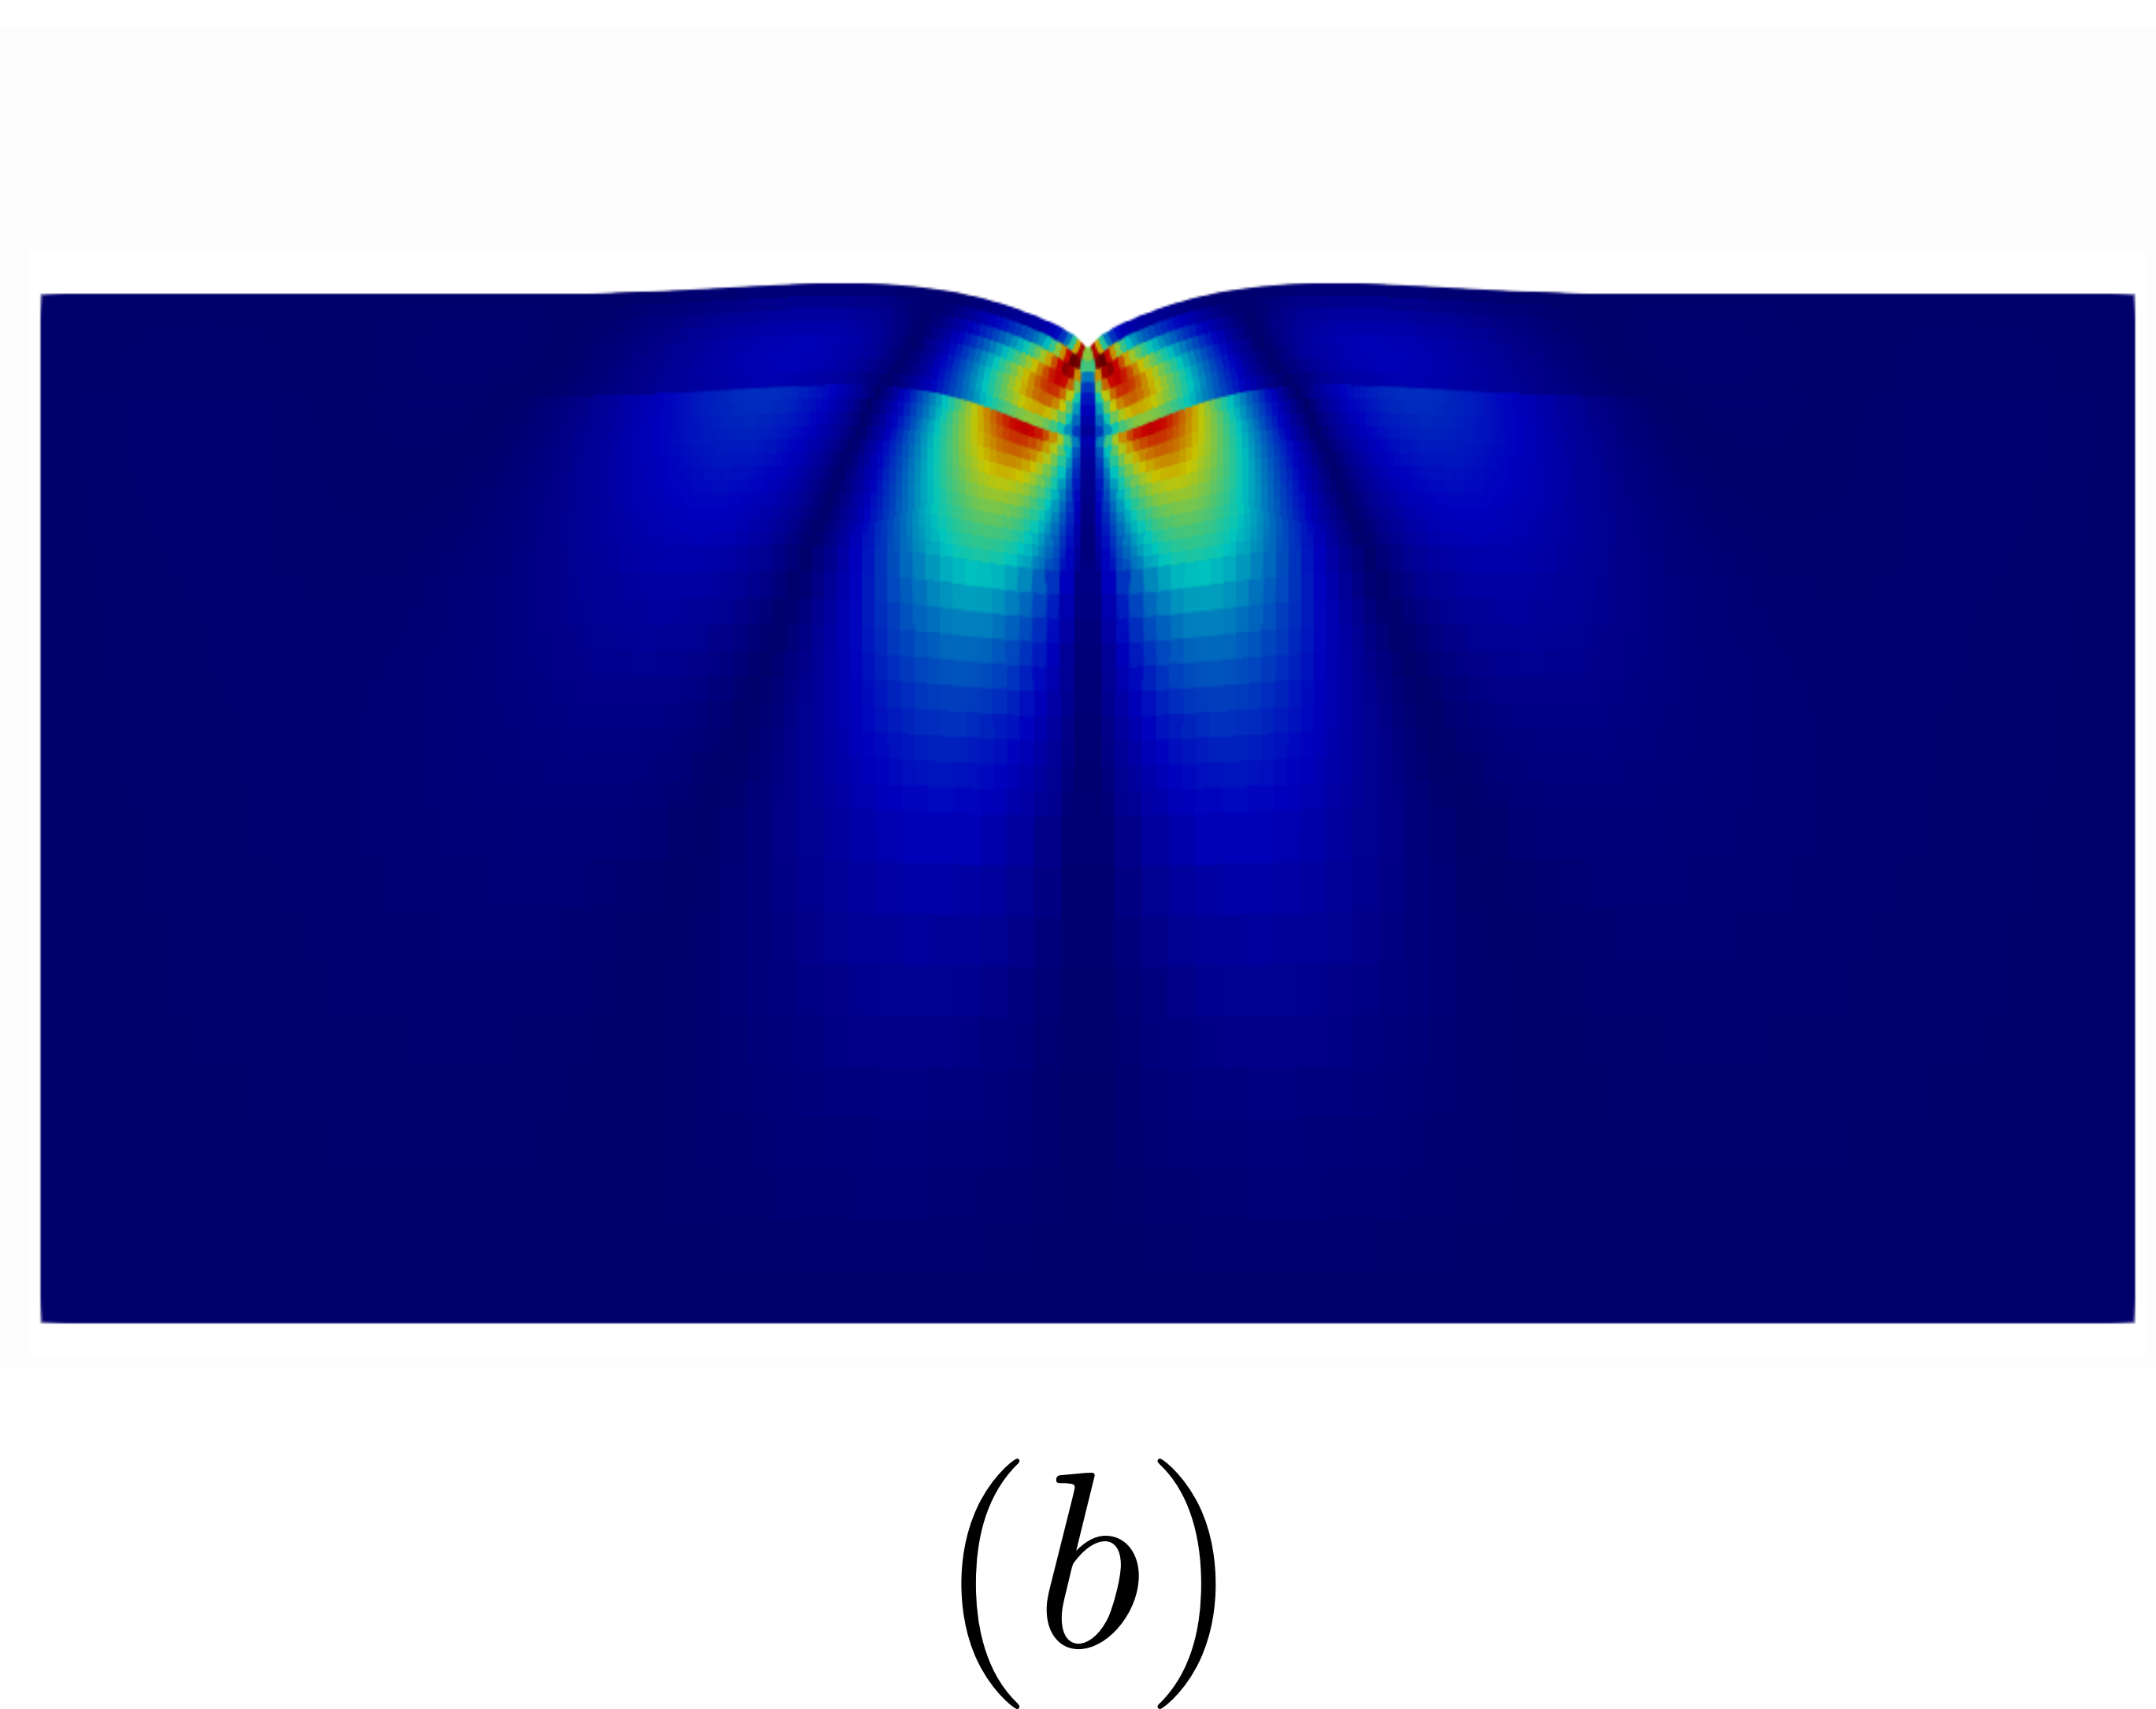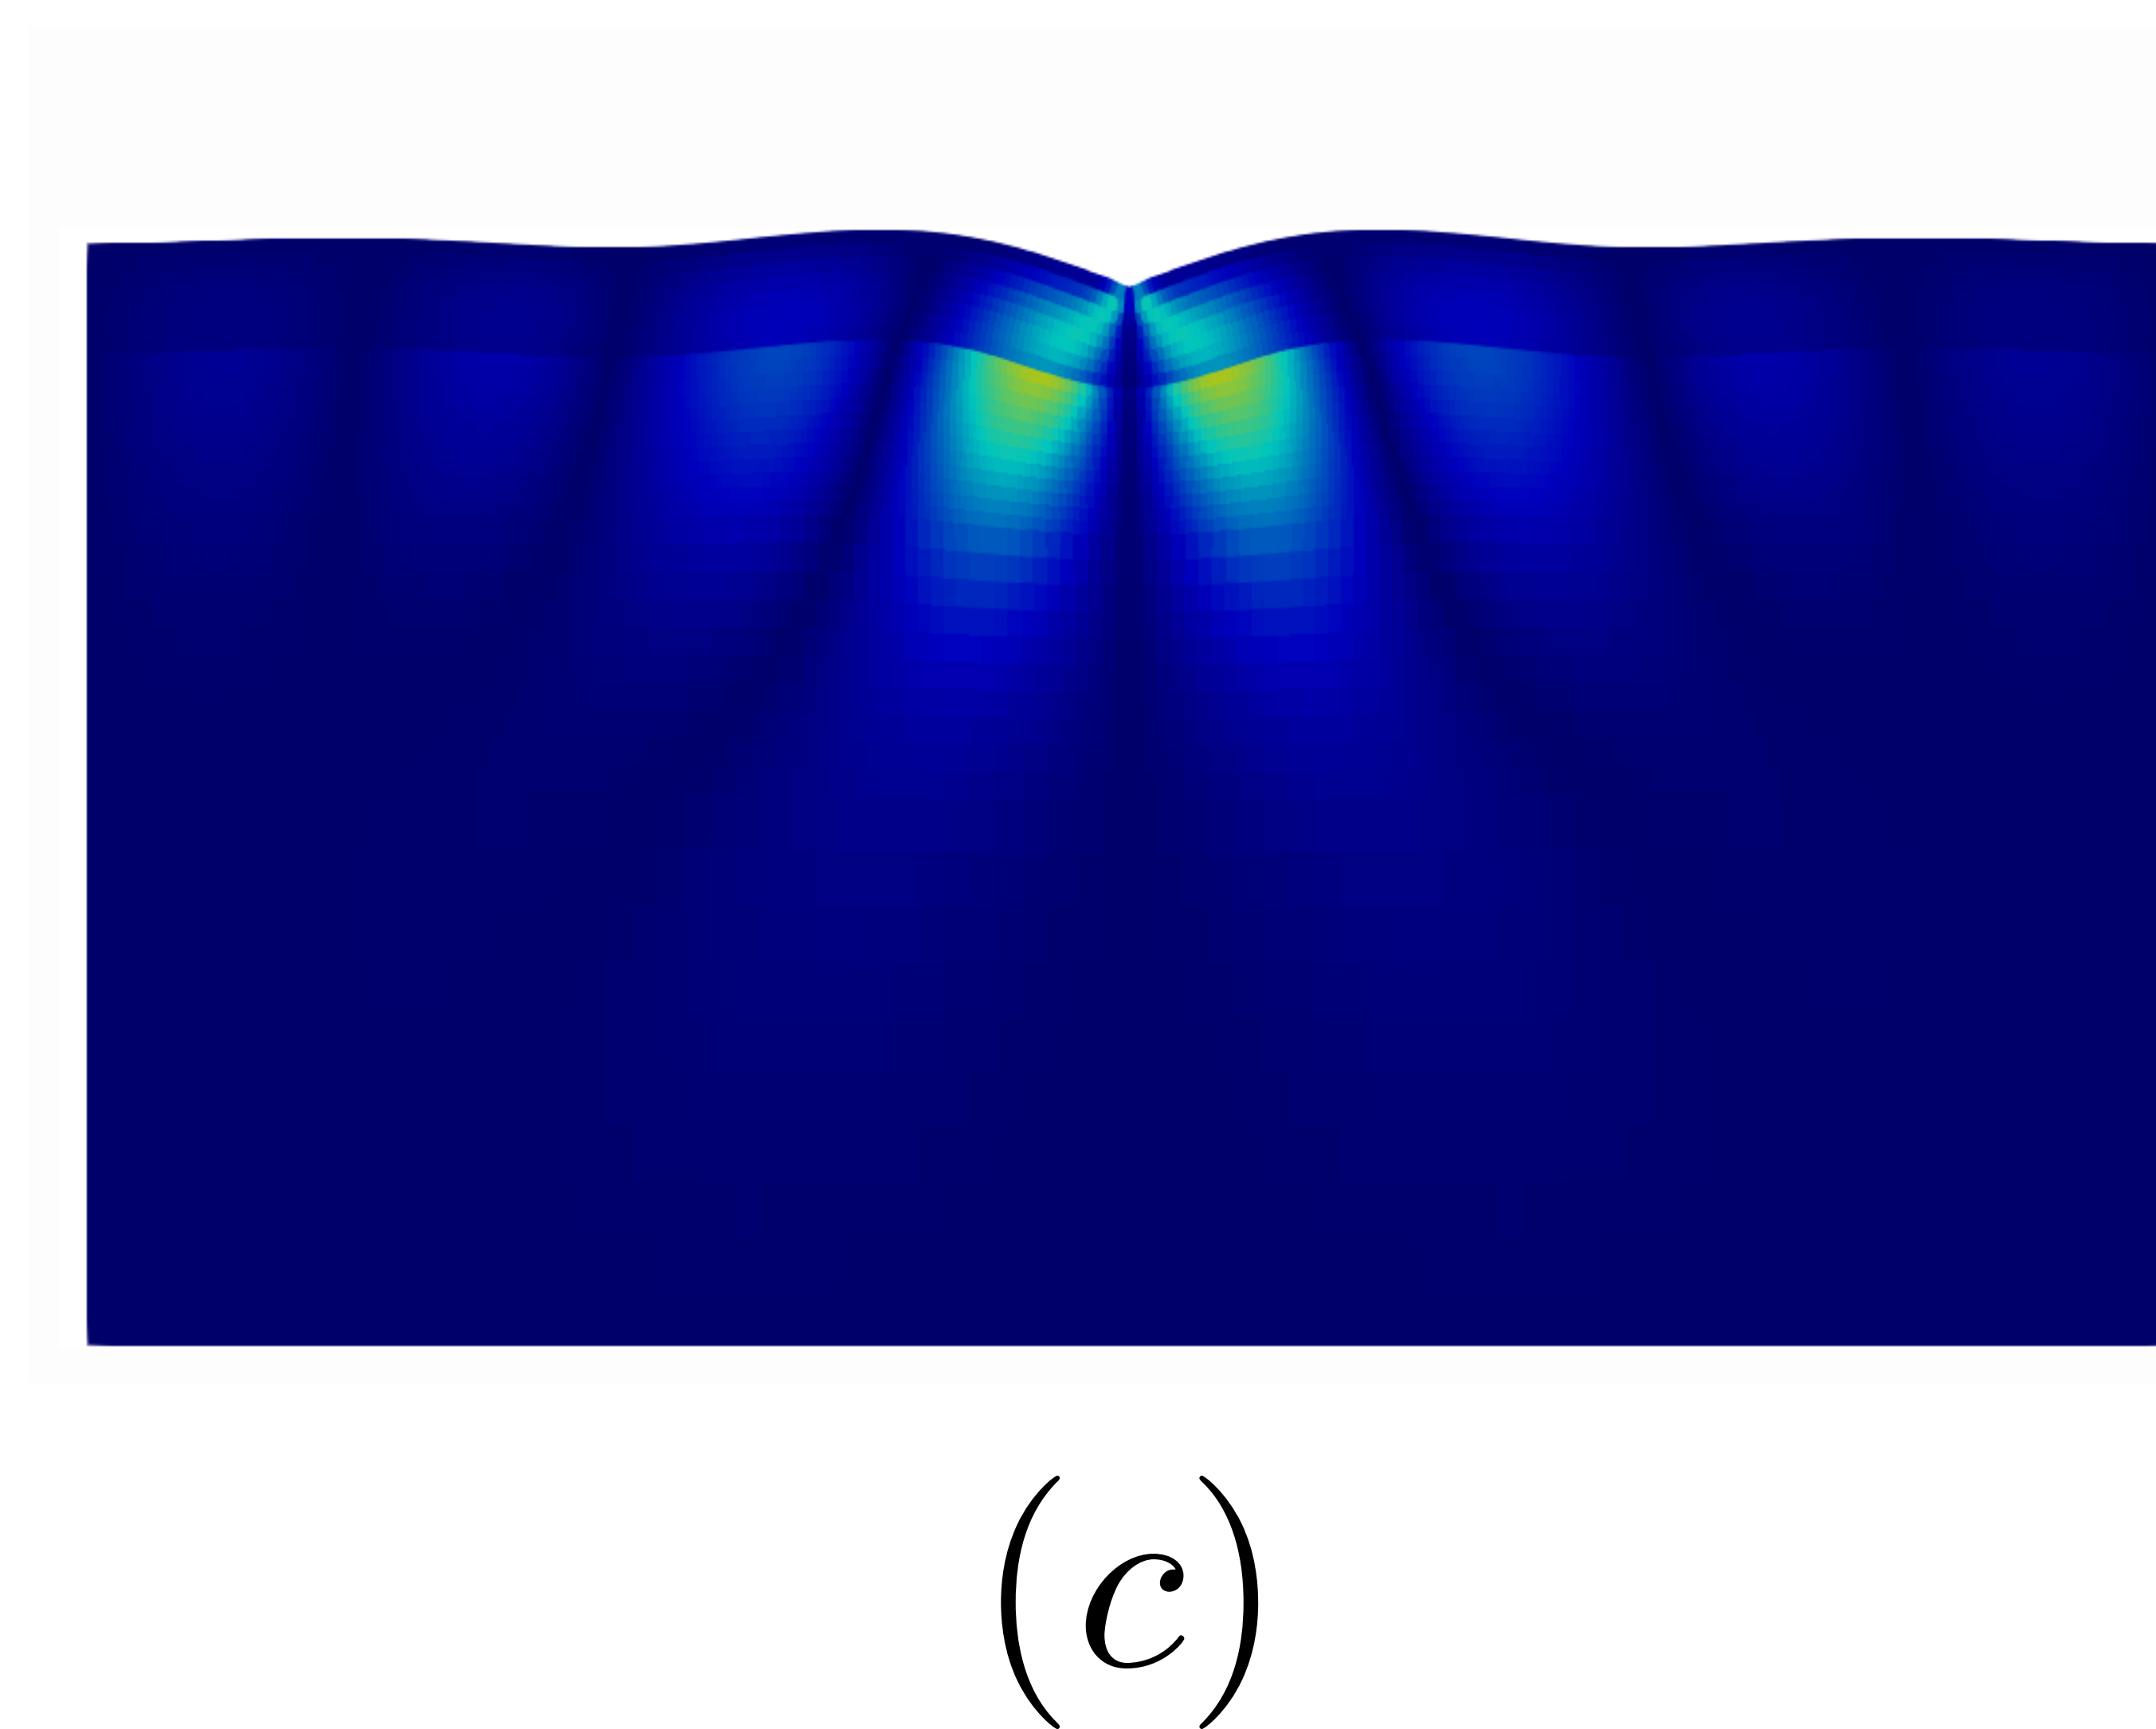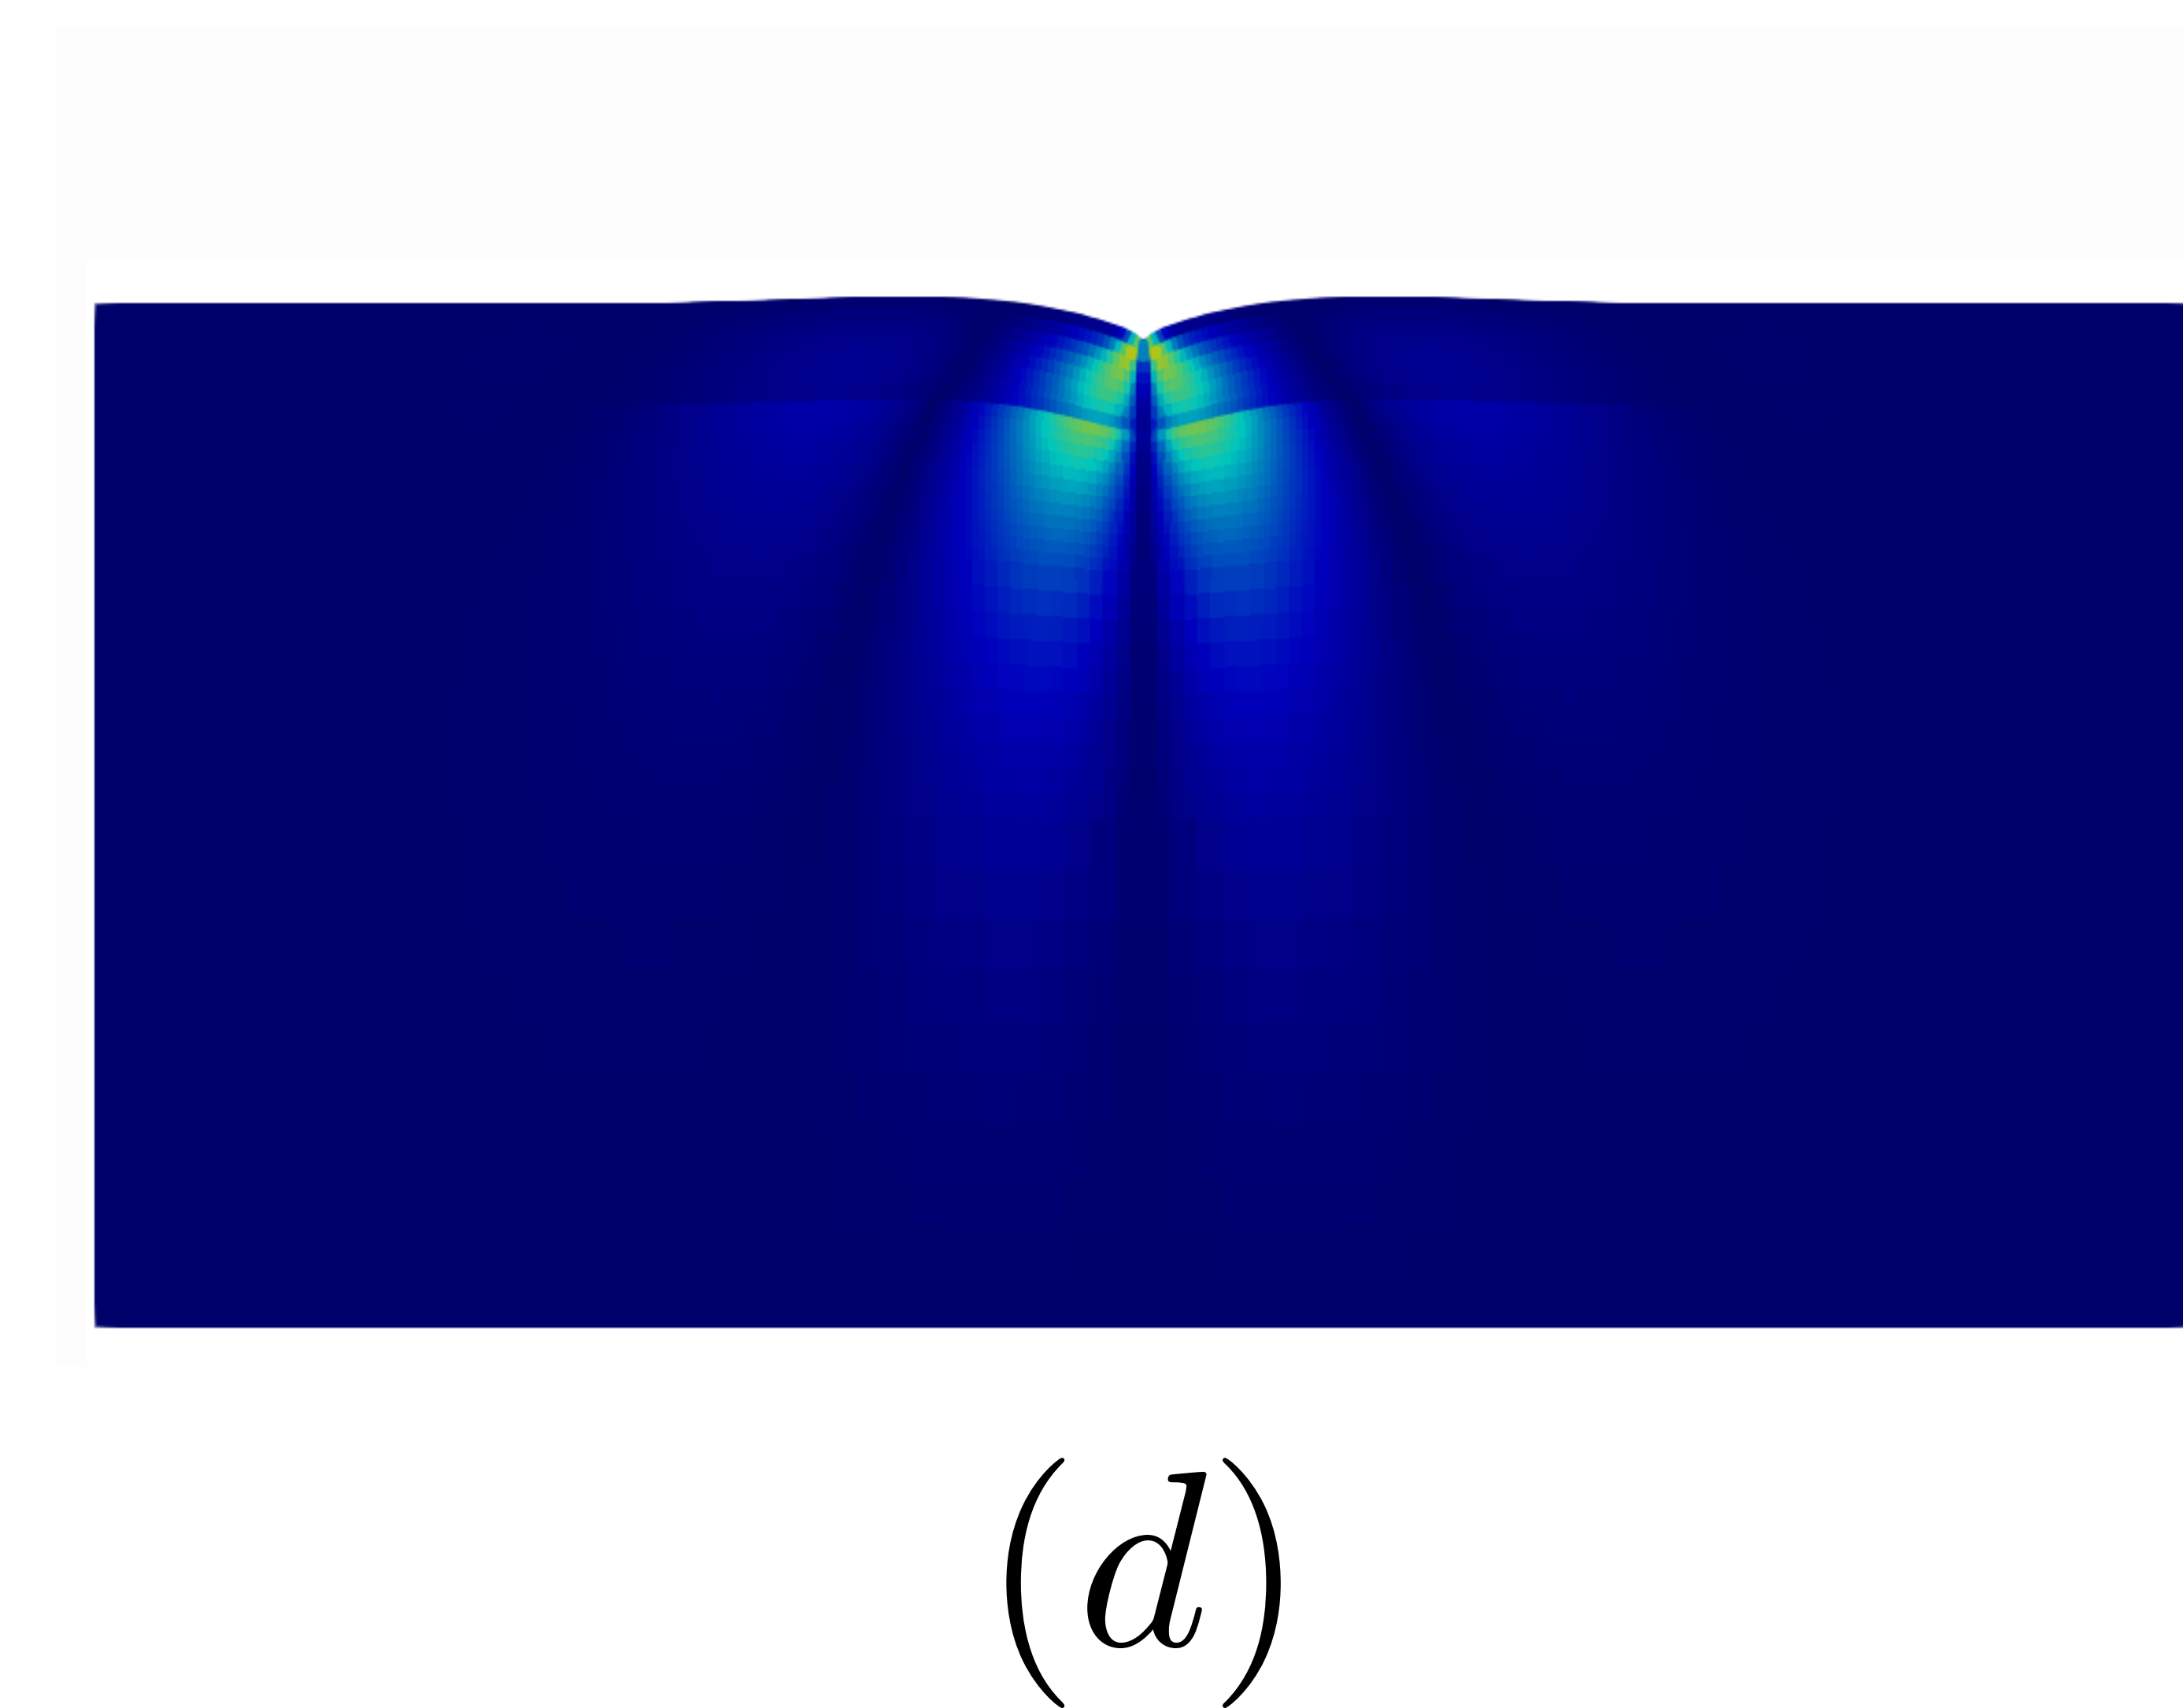

Supplement: Supplementary file 119 [file 36493543]

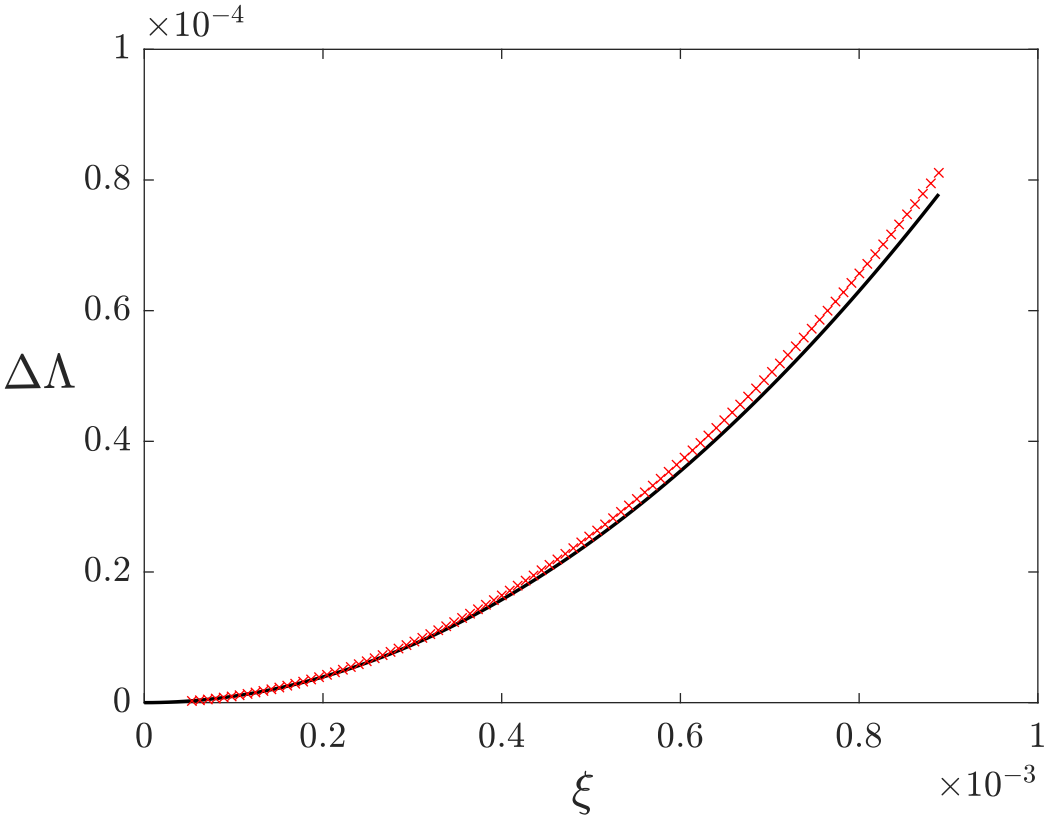

Supplement: Supplementary file 120 [file 36493543]

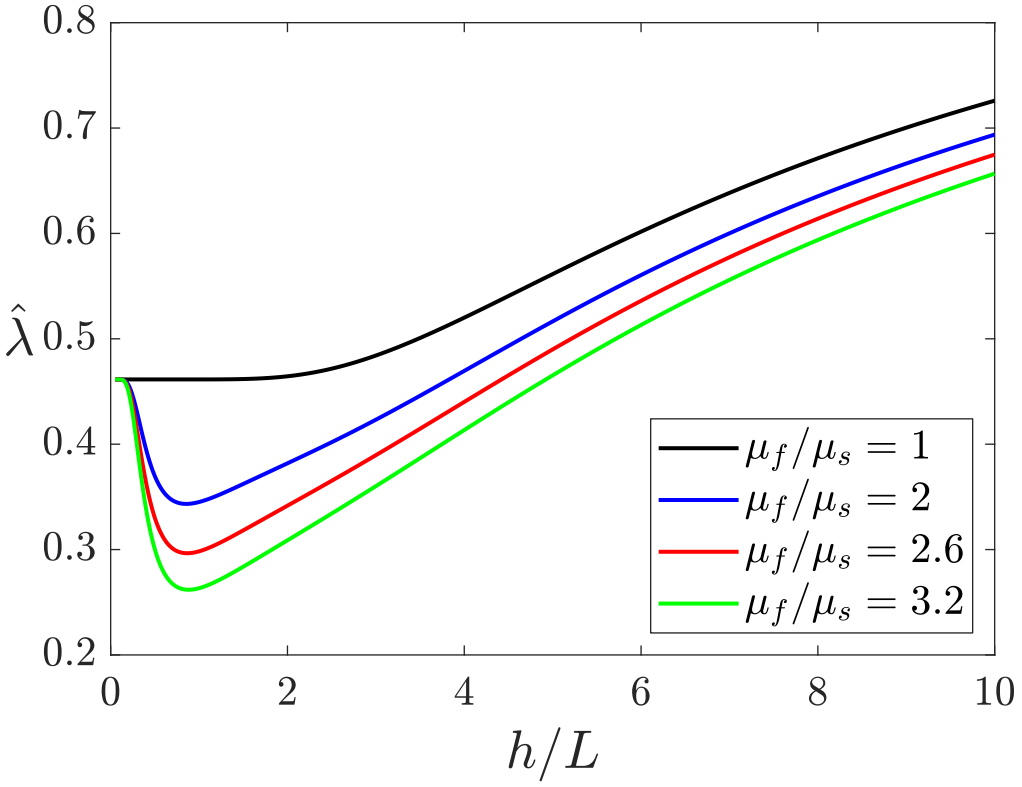

Supplement: Supplementary file 121 [file 36493543]

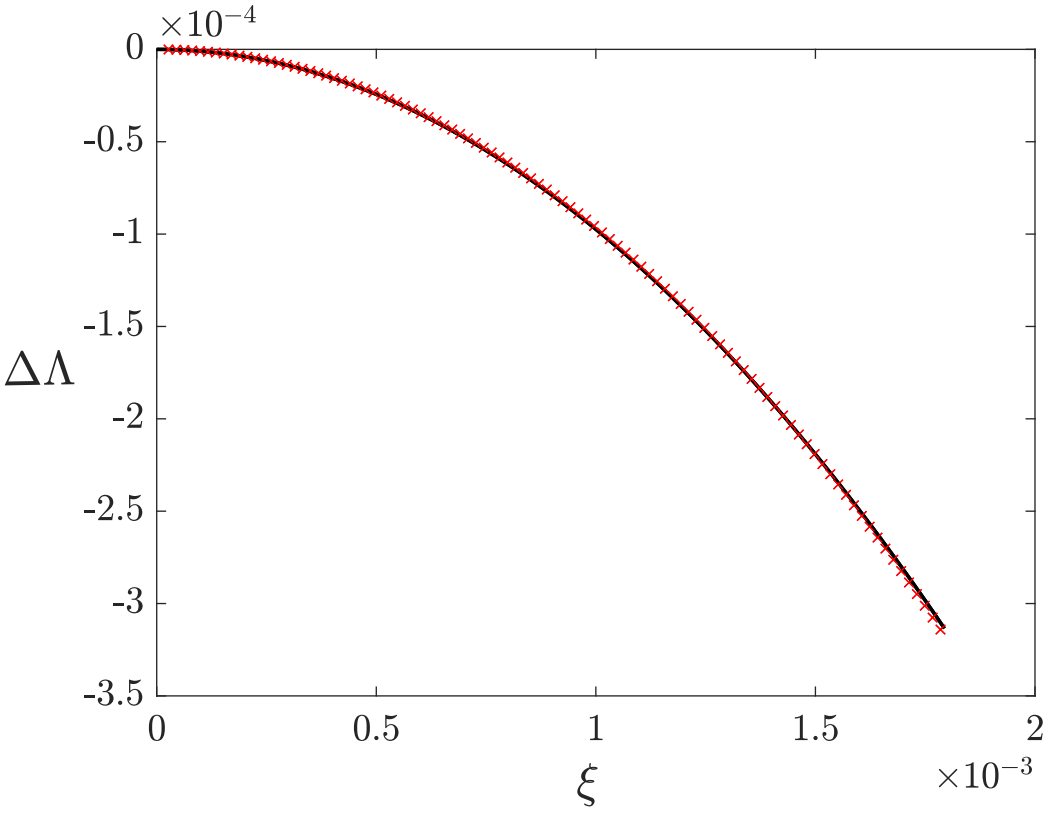

Supplement: Supplementary file 122 [file 36493543]

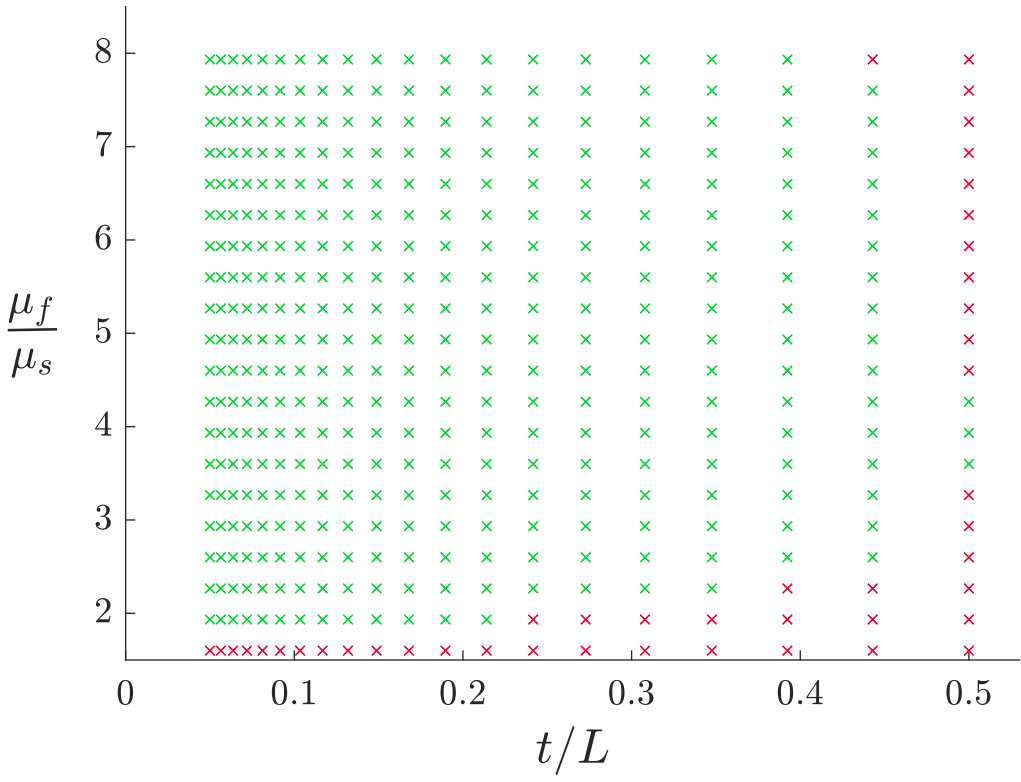

Supplement: Supplementary file 123 [file 36493543]

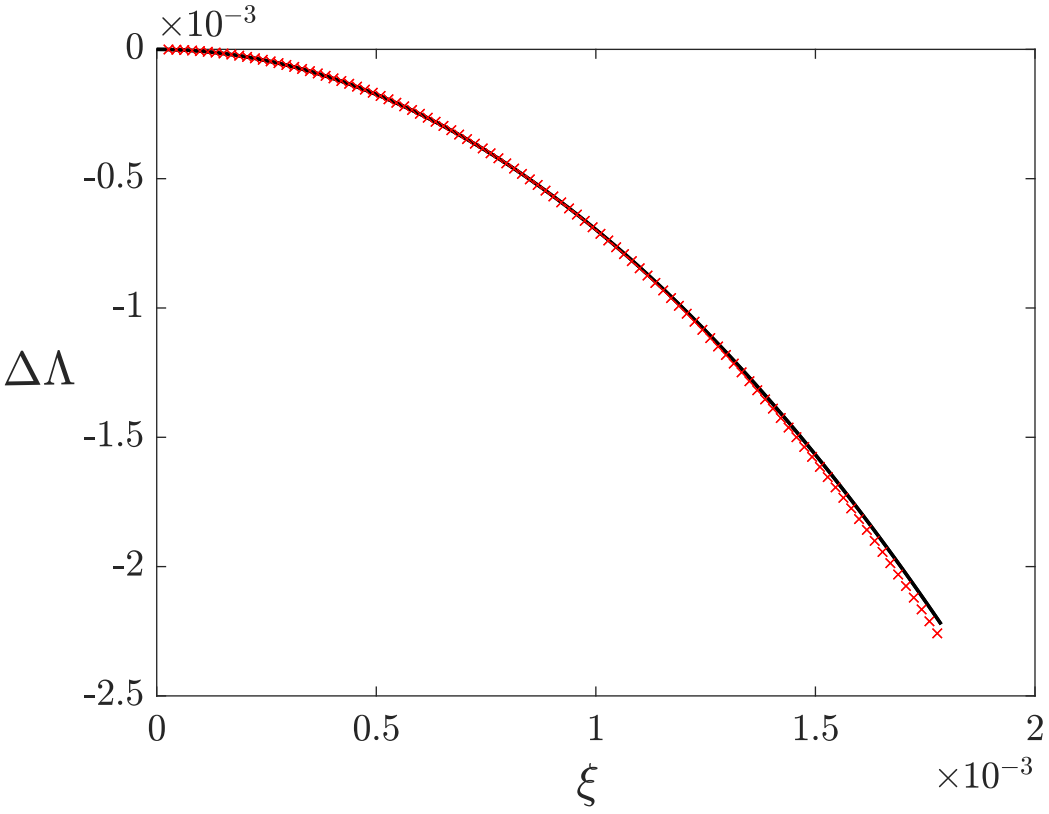

Supplement: Supplementary file 124 [file 36493543]

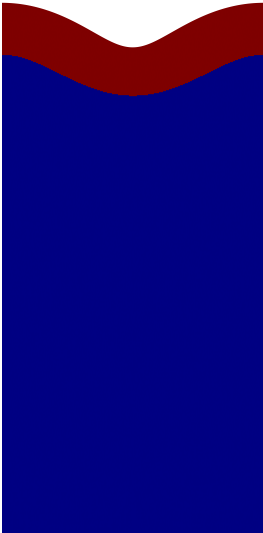

Supplement: Supplementary file 125 [file 36493543]

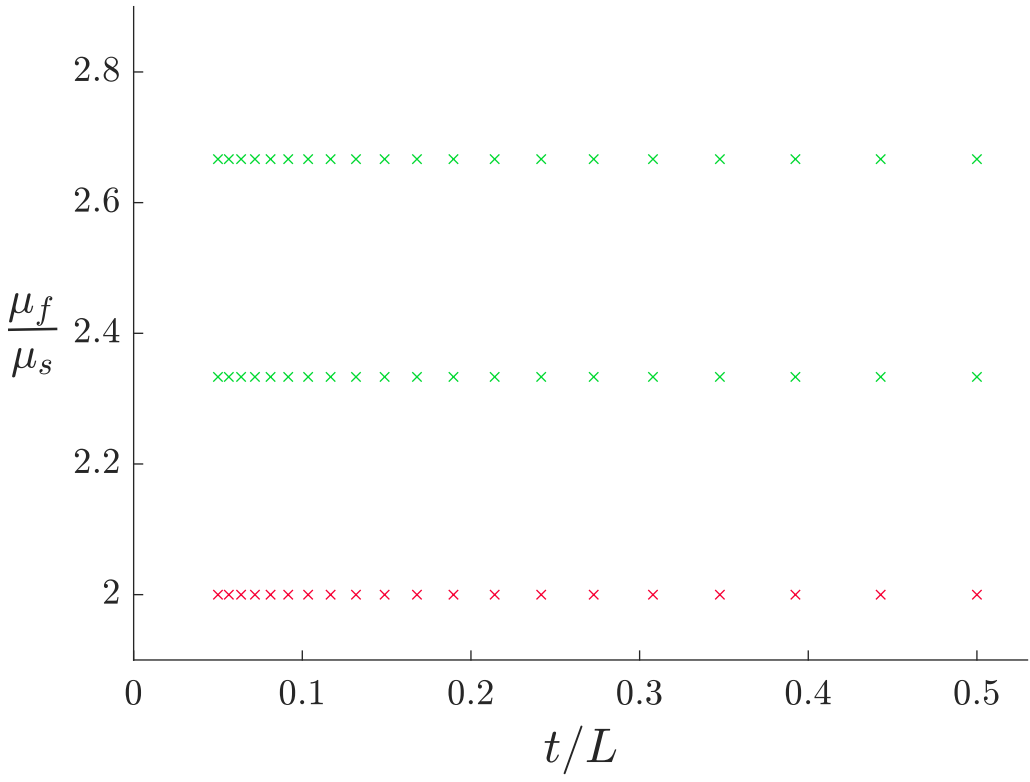

Supplement: Supplementary file 126 [file 36493543]

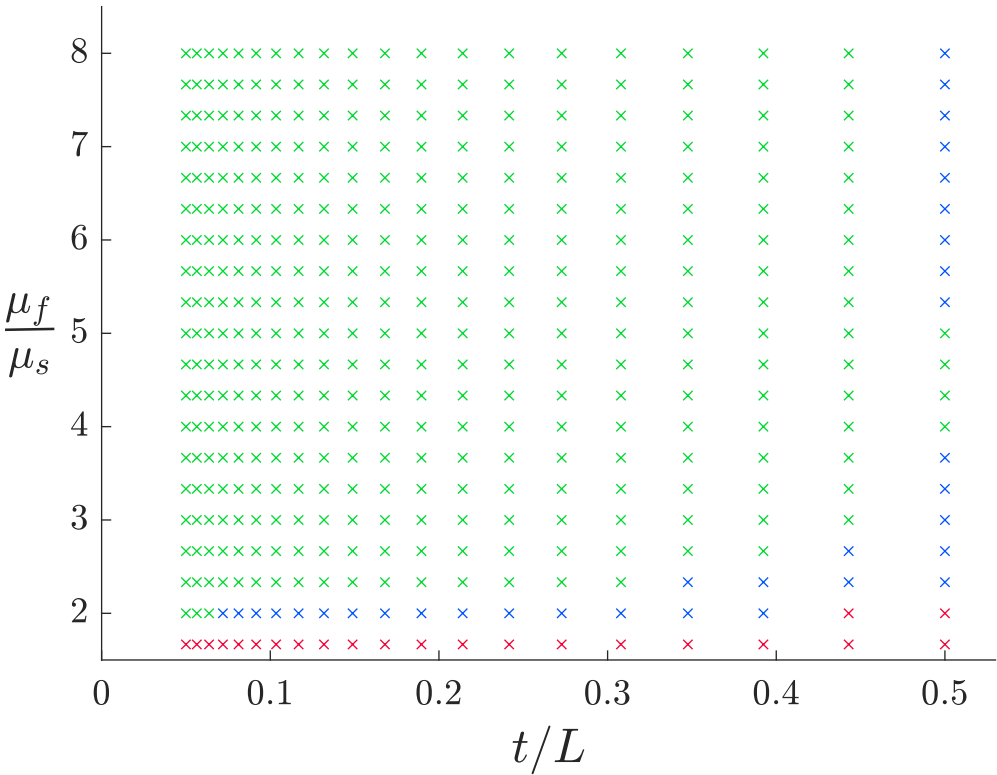

Supplement: Supplementary file 127 [file 36493543]

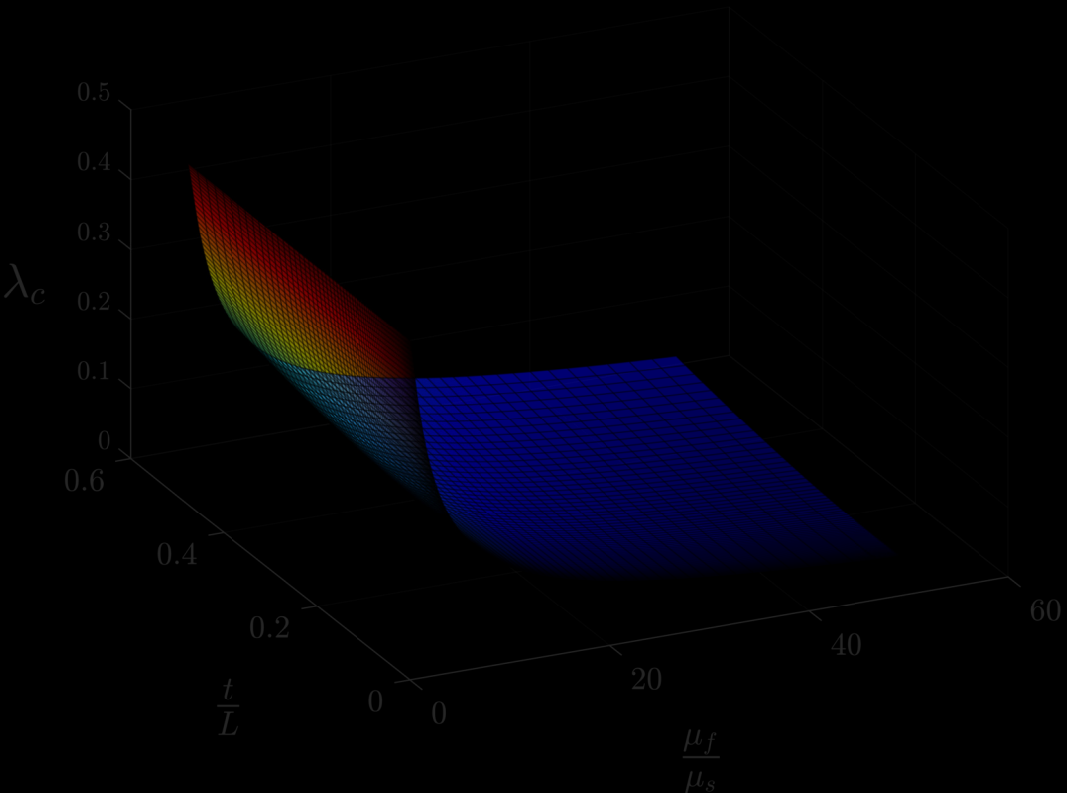

Supplement: Supplementary file 128 [file 36493543]

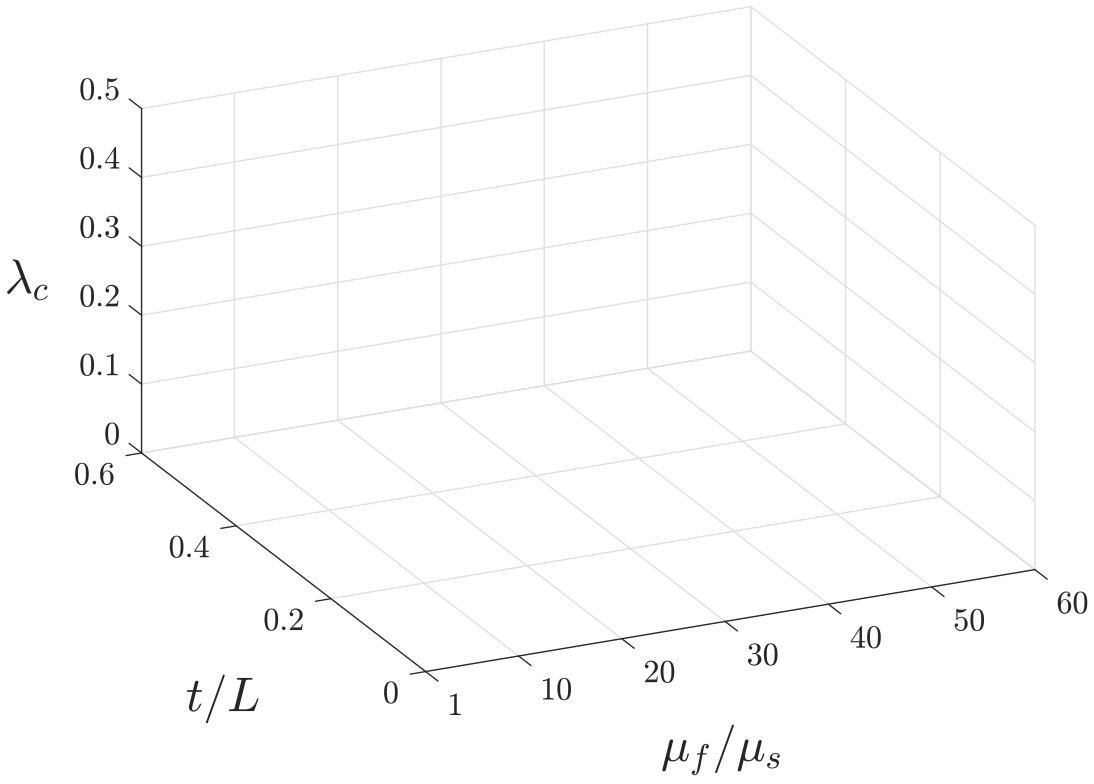

Supplement: Supplementary file 129 [file 36493543]

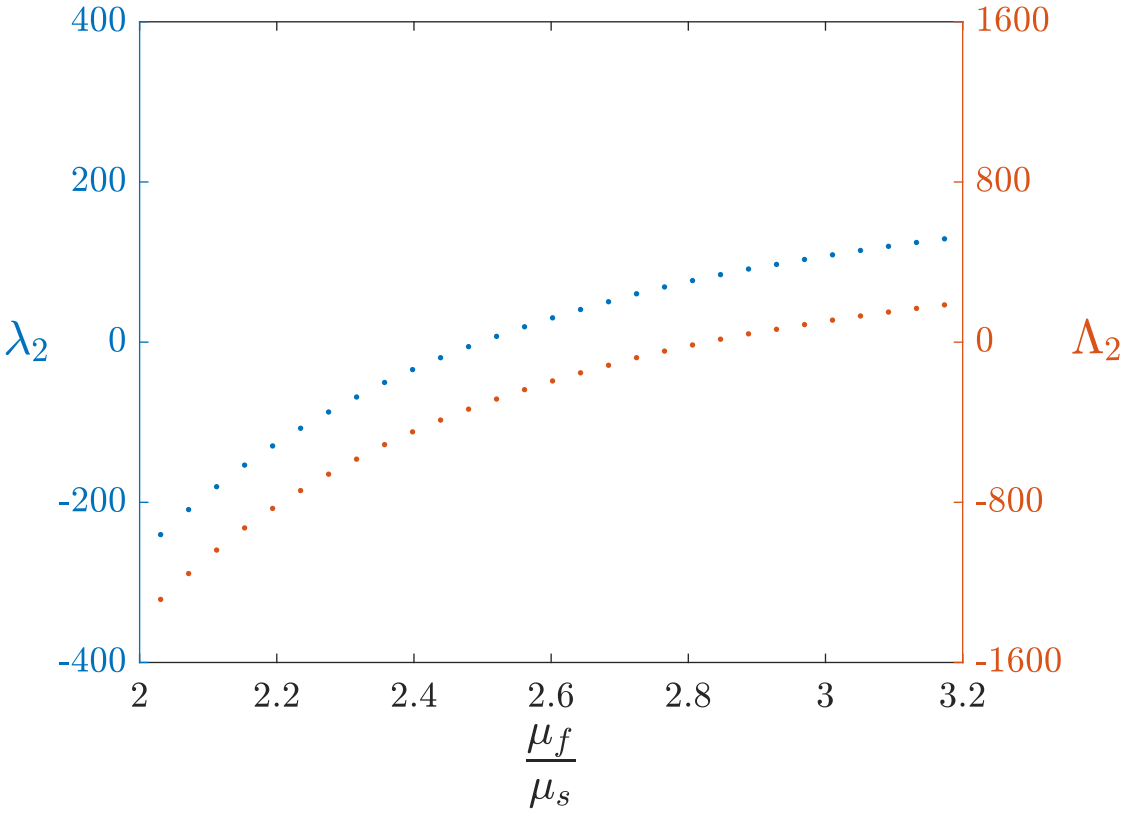

Supplement: Supplementary file 130 [file 36493543]

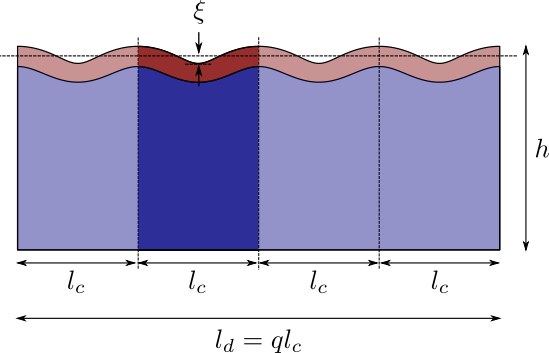

Supplement: Supplementary file 131 [file 36493543]

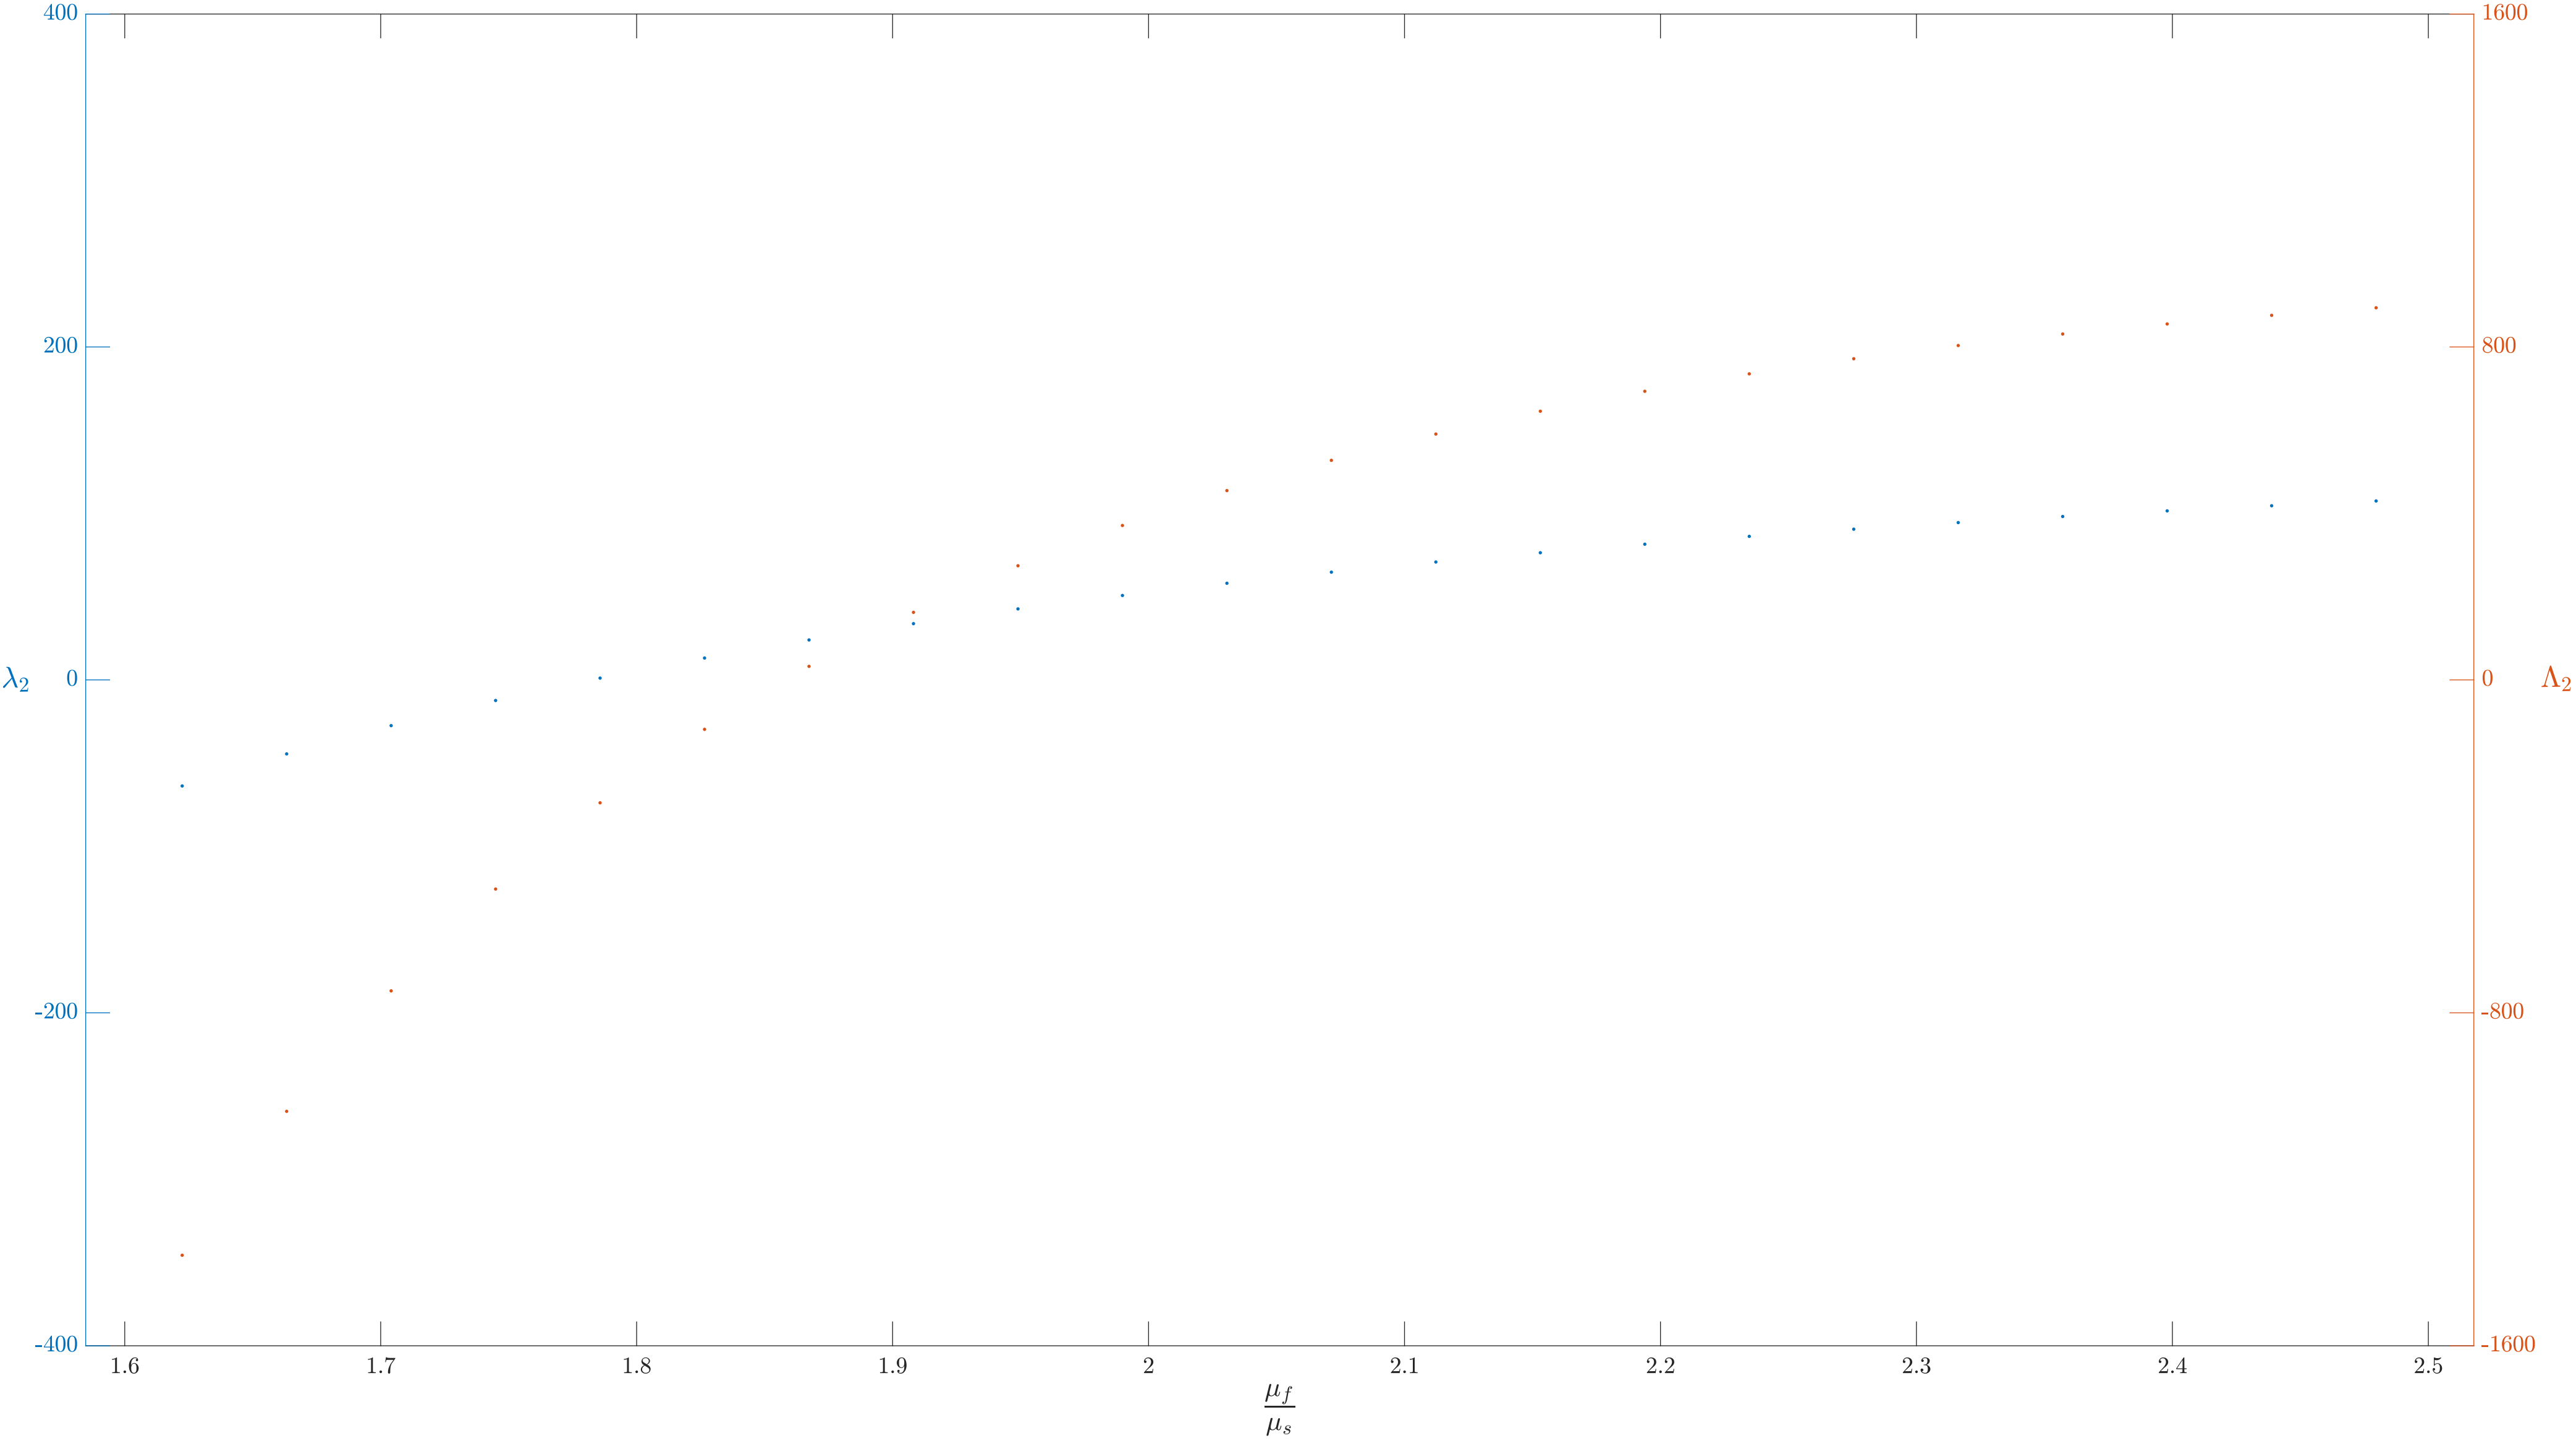

Supplement: Supplementary file 132 [file 36493543]

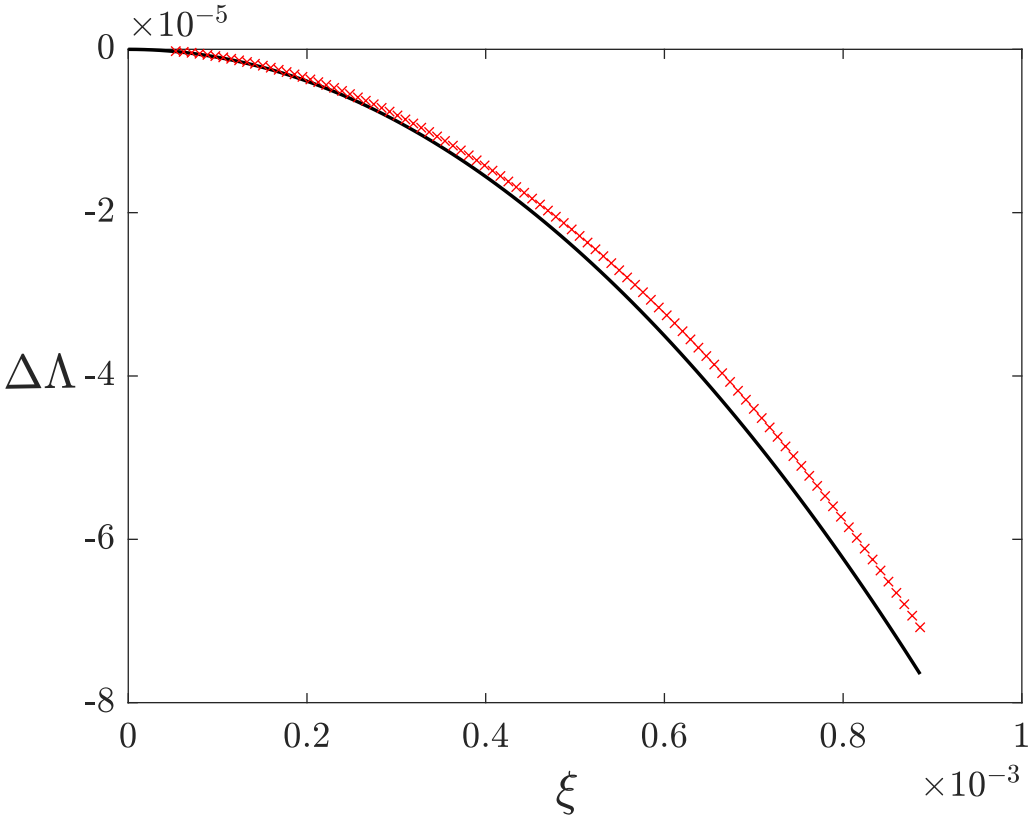

Supplement: Supplementary file 133 [file 36493543]

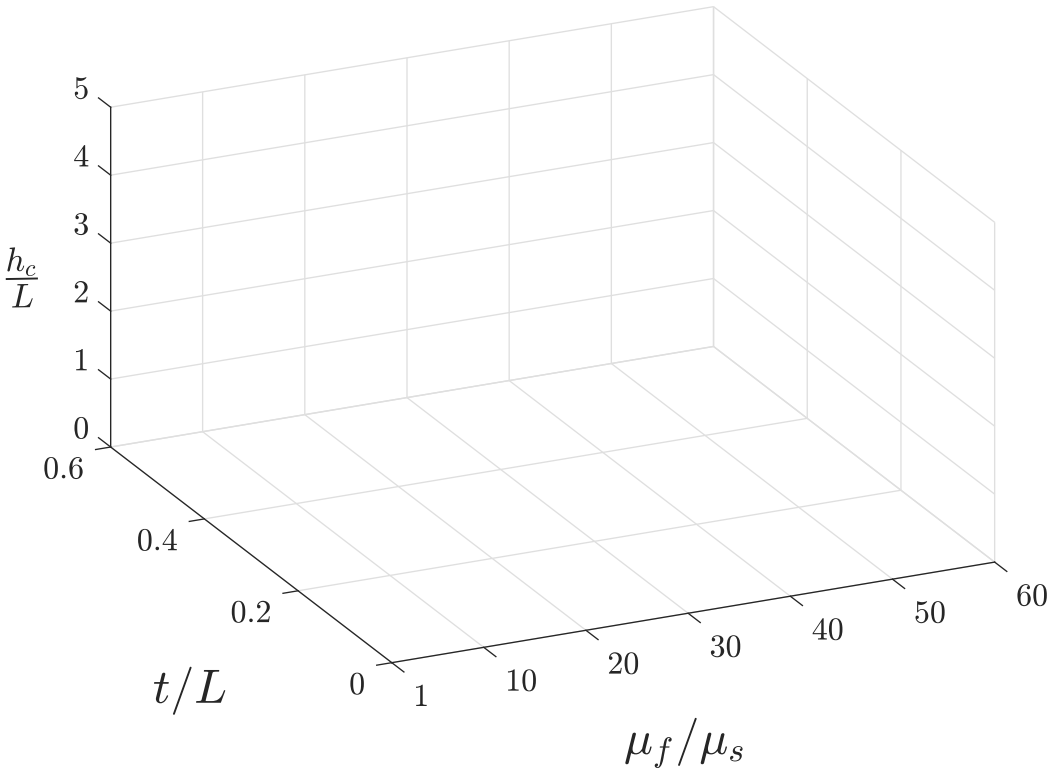

Supplement: Supplementary file 134 [file 36493543]

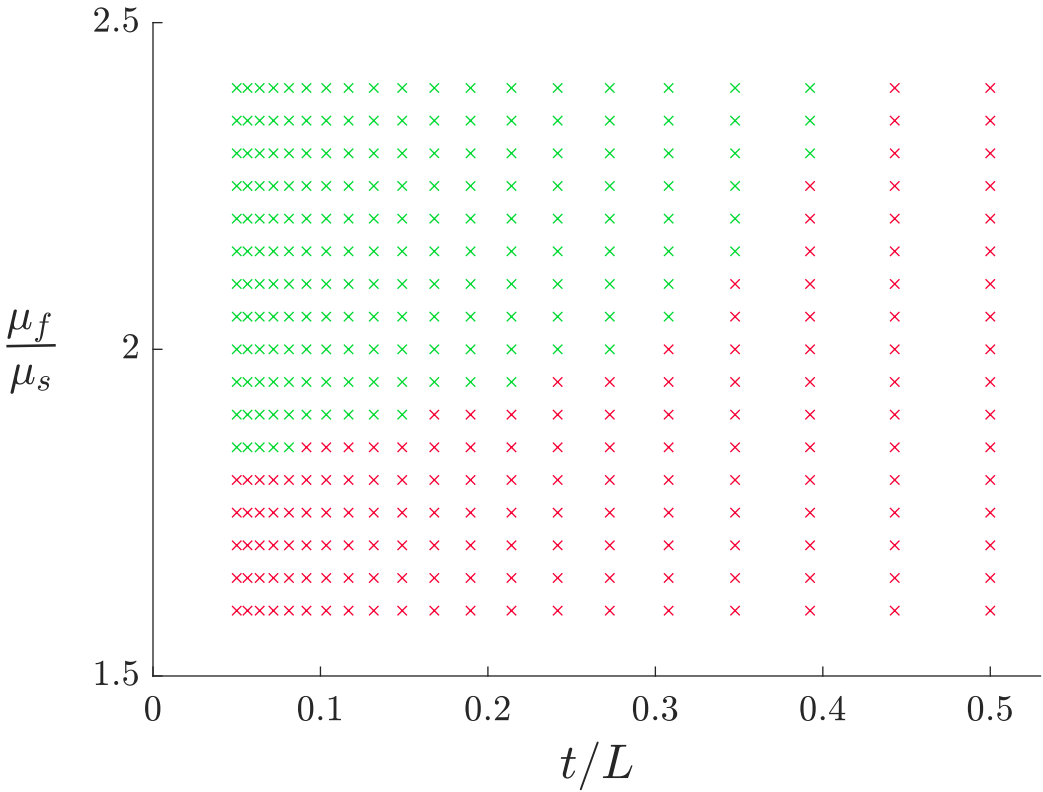

Supplement: Supplementary file 135 [file 36493543]

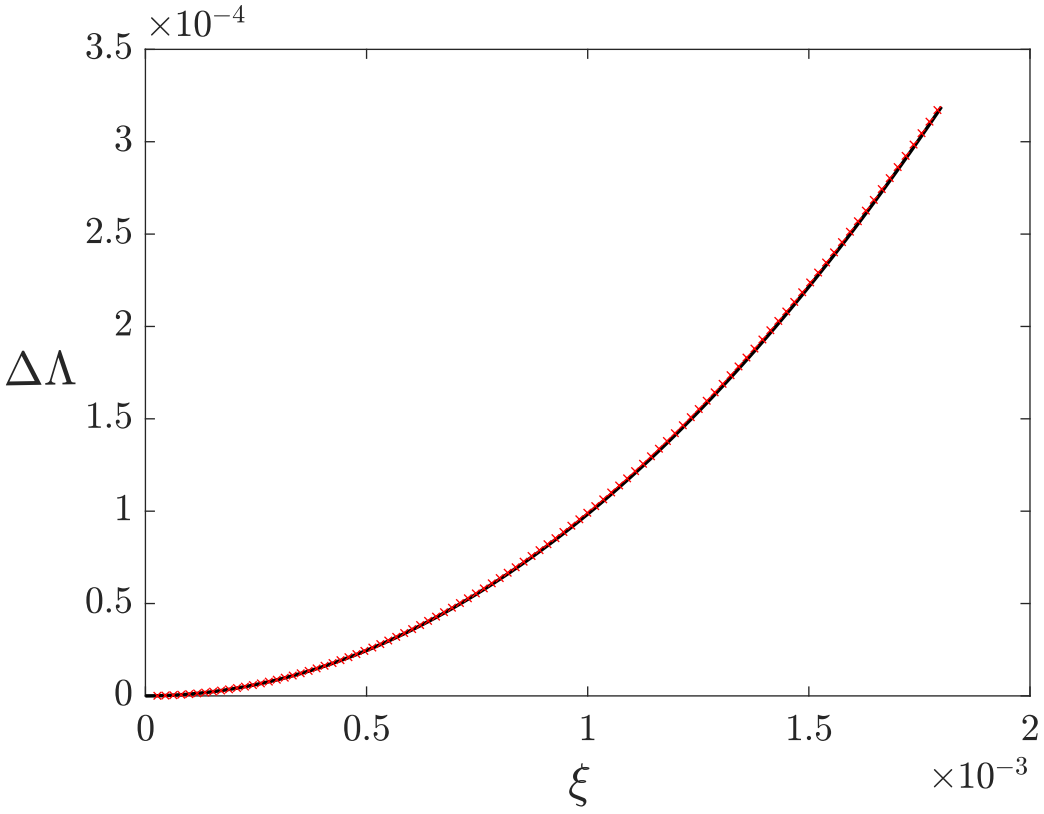

Supplement: Supplementary file 136 [file 36493543]

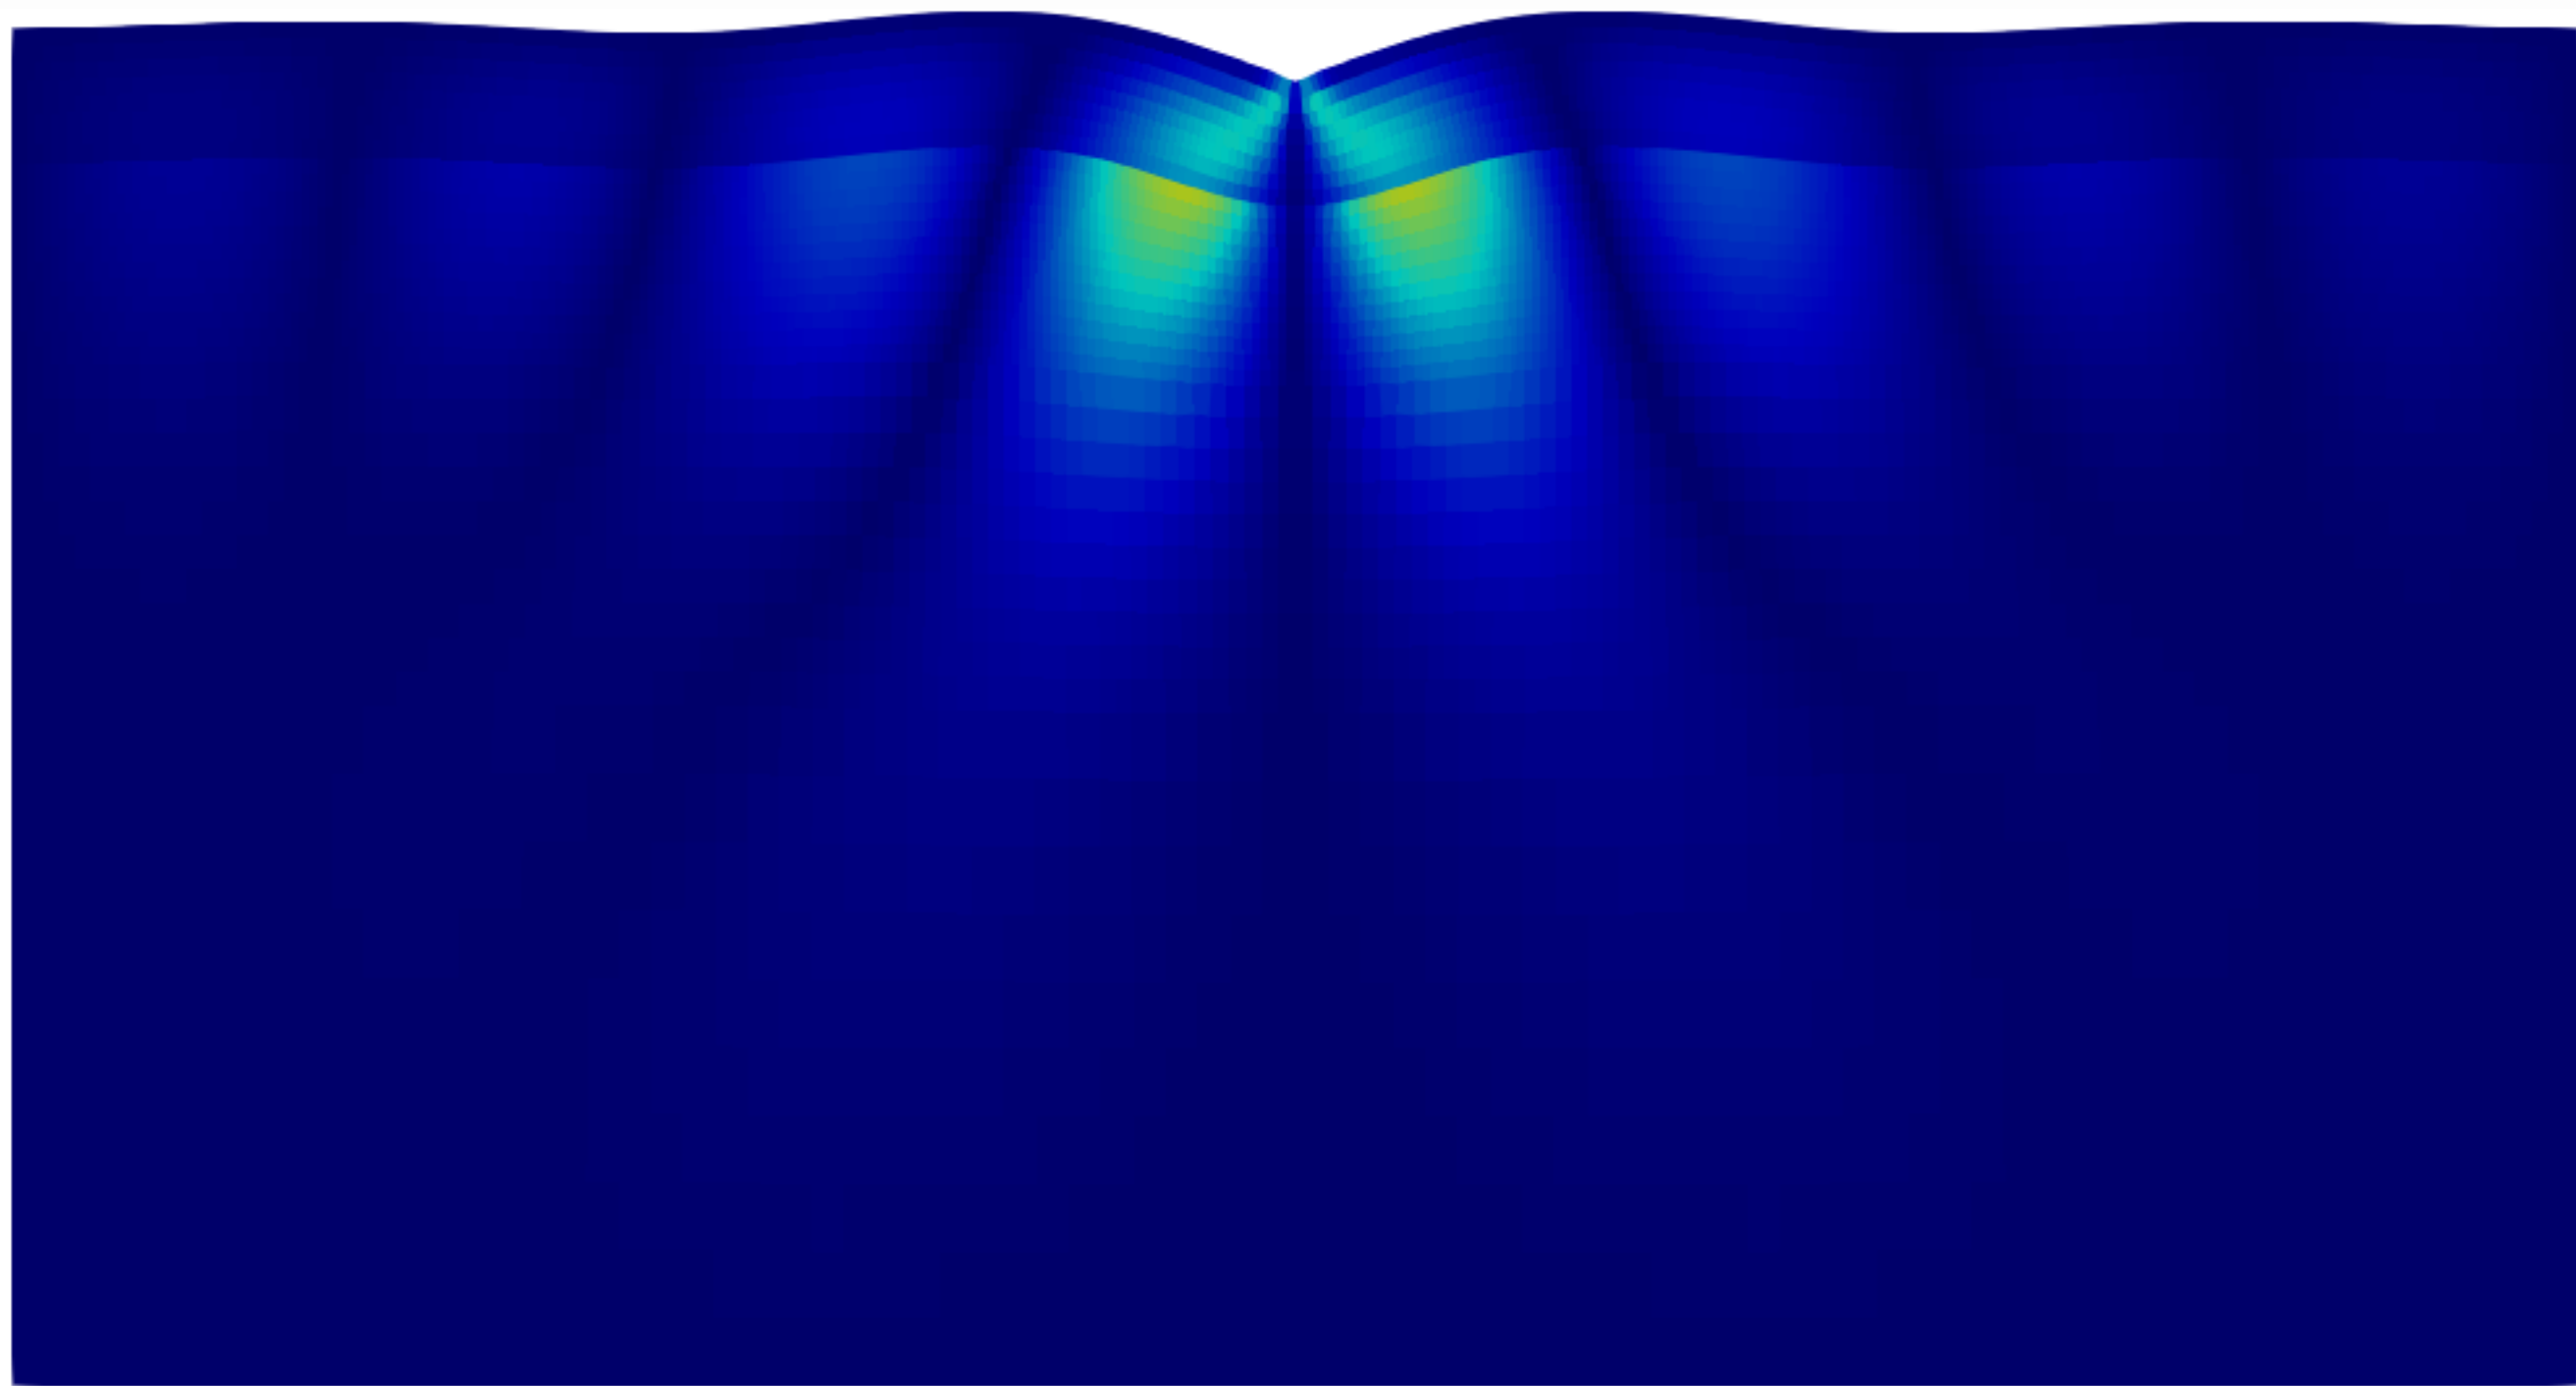

Supplement: Supplementary file 137 [file 36493543]

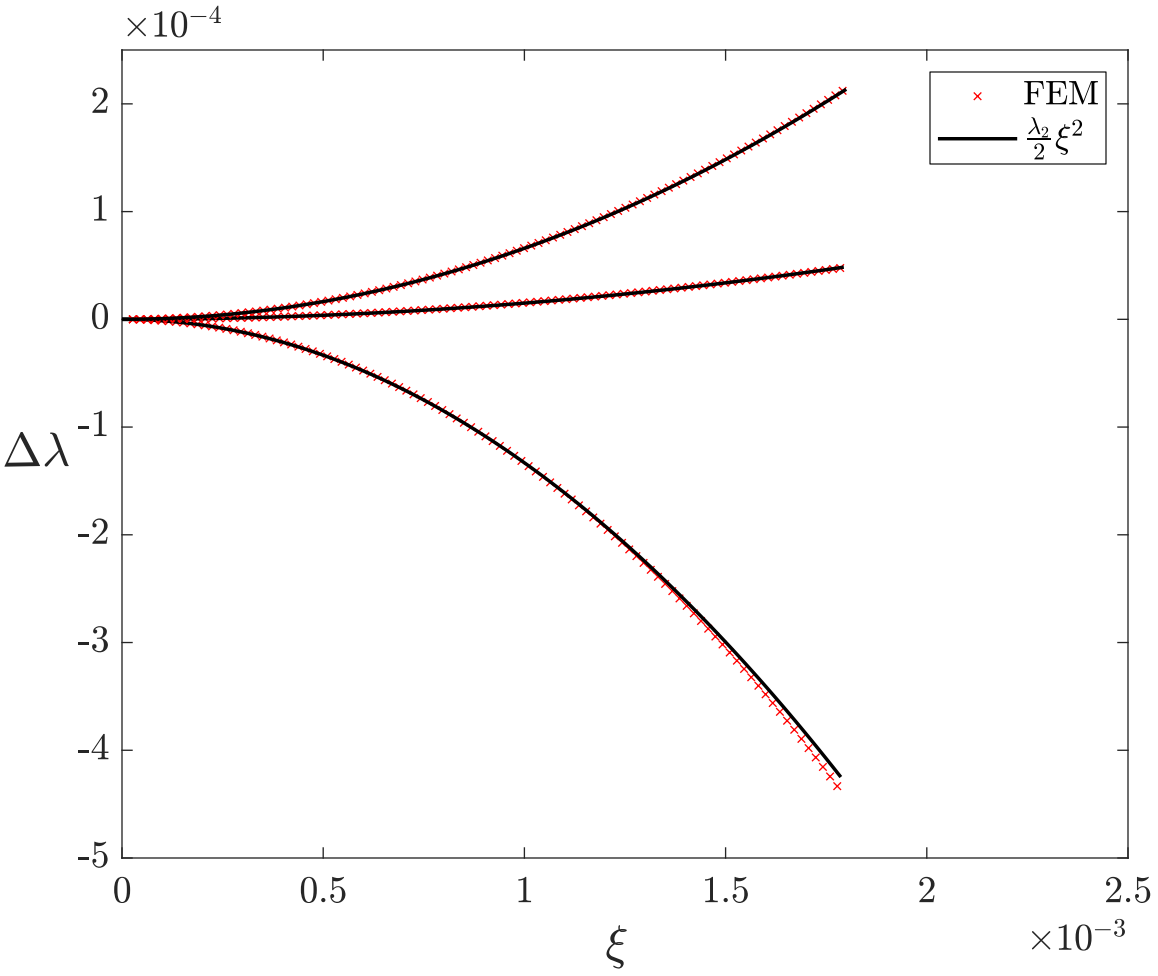

Supplement: Supplementary file 138 [file 36493543]

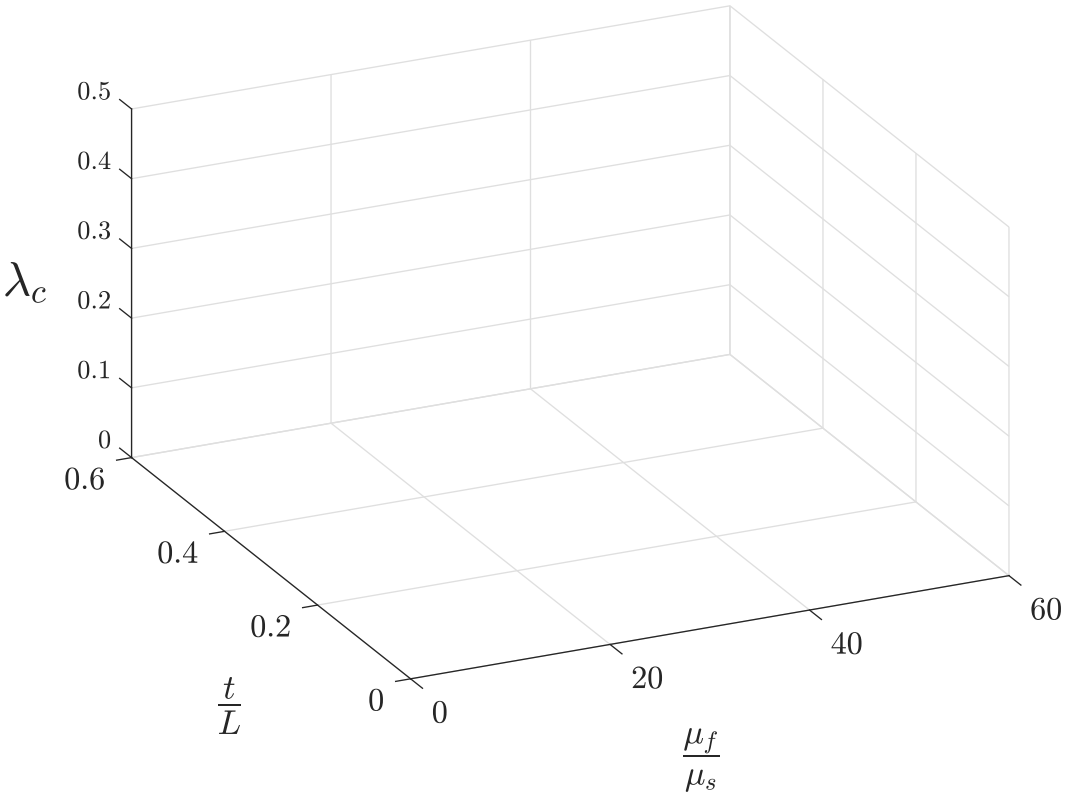

Supplement: Supplementary file 139 [file 36493543]

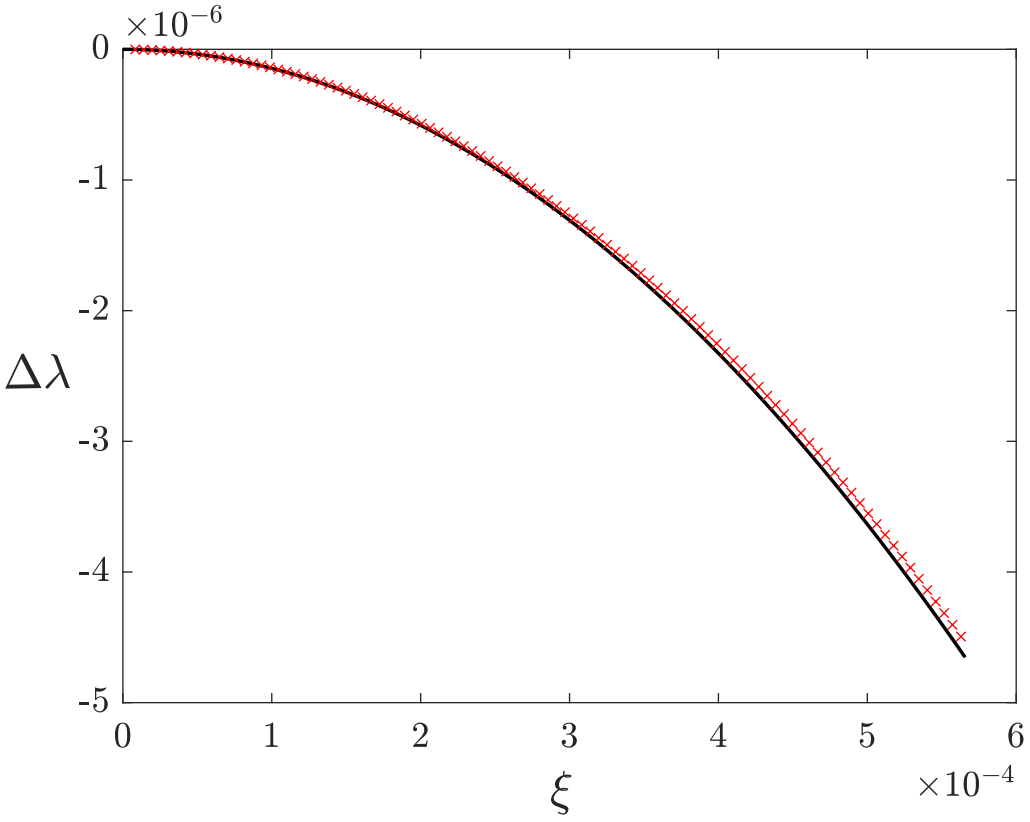

Supplement: Supplementary file 140 [file 36493543]

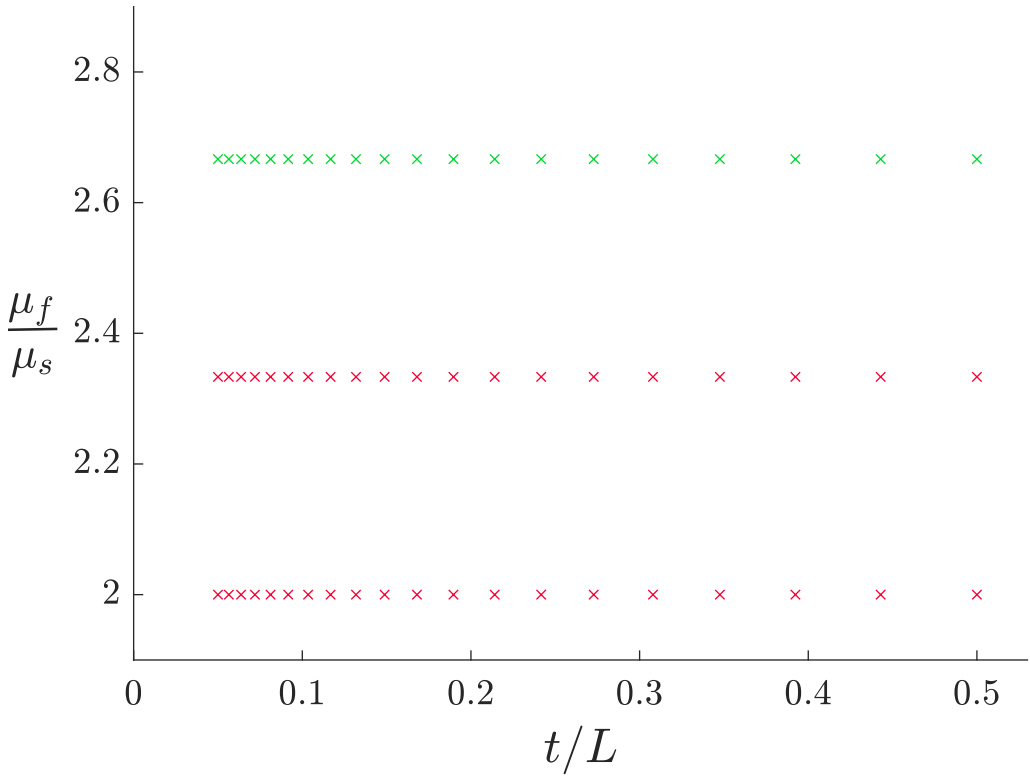

Supplement: Supplementary file 141 [file 36493543]

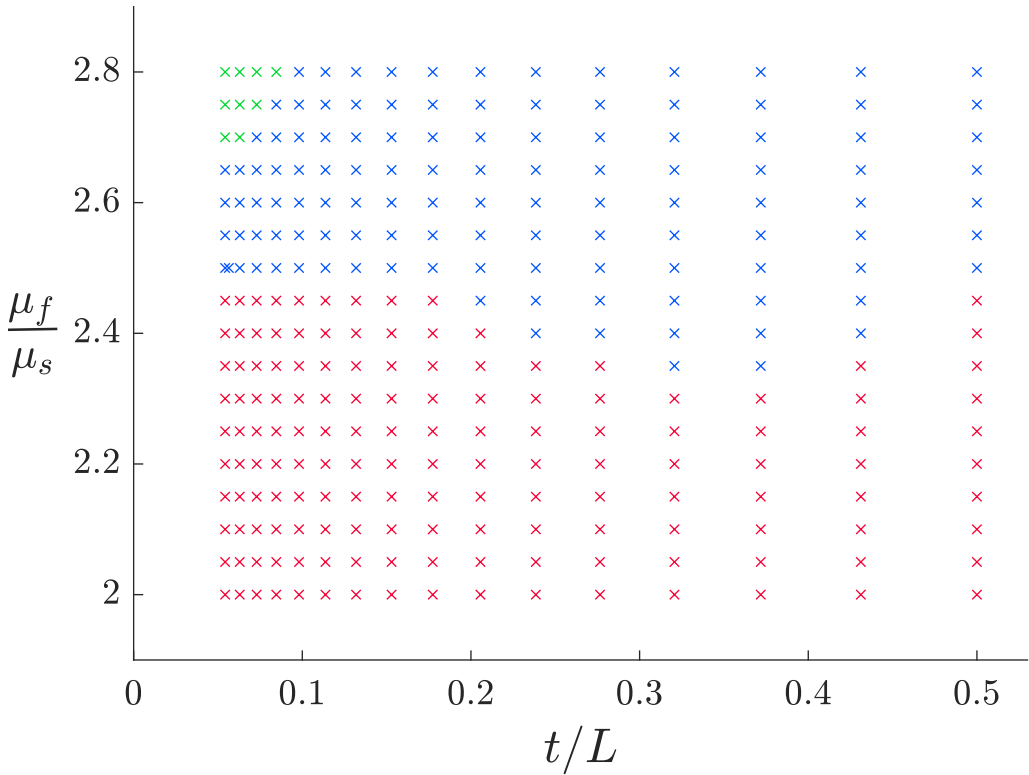

Supplement: Supplementary file 142 [file 36493543]

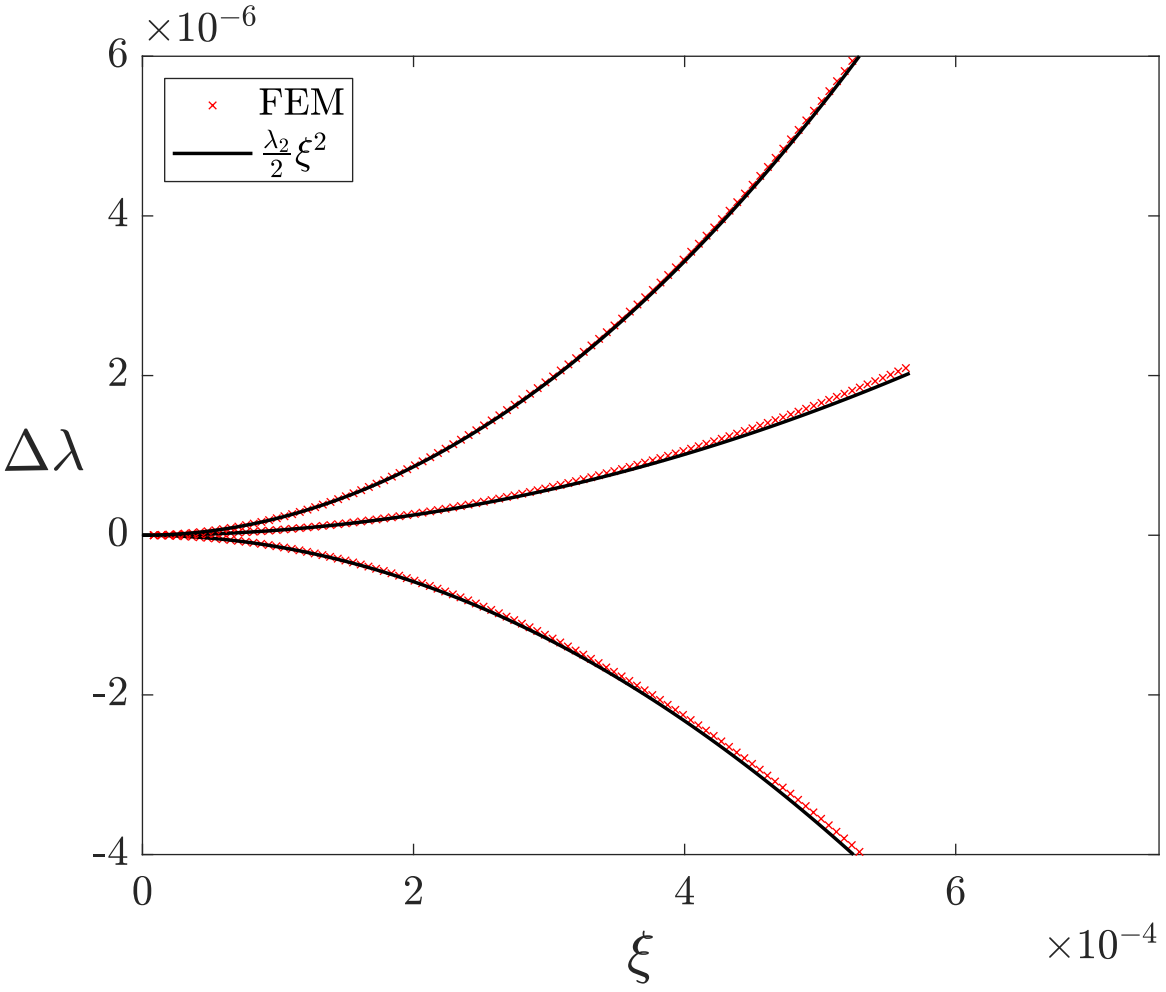

Supplement: Supplementary file 143 [file 36493543]

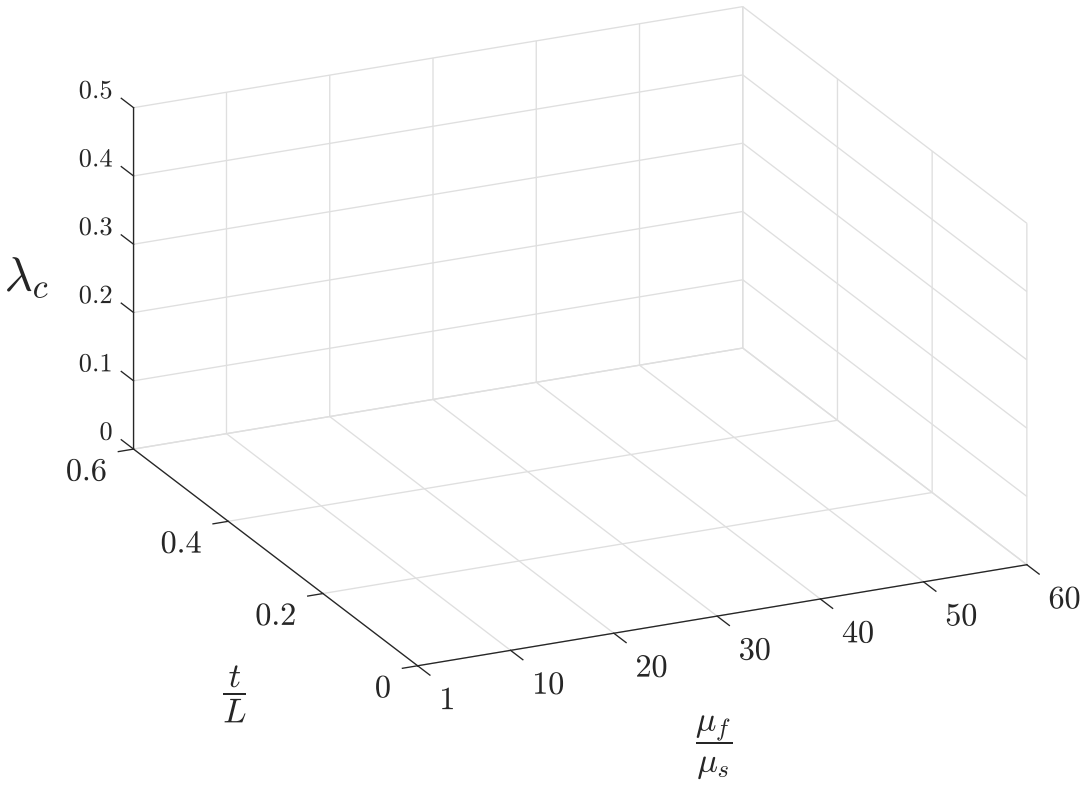

Supplement: Supplementary file 144 [file 36493543]

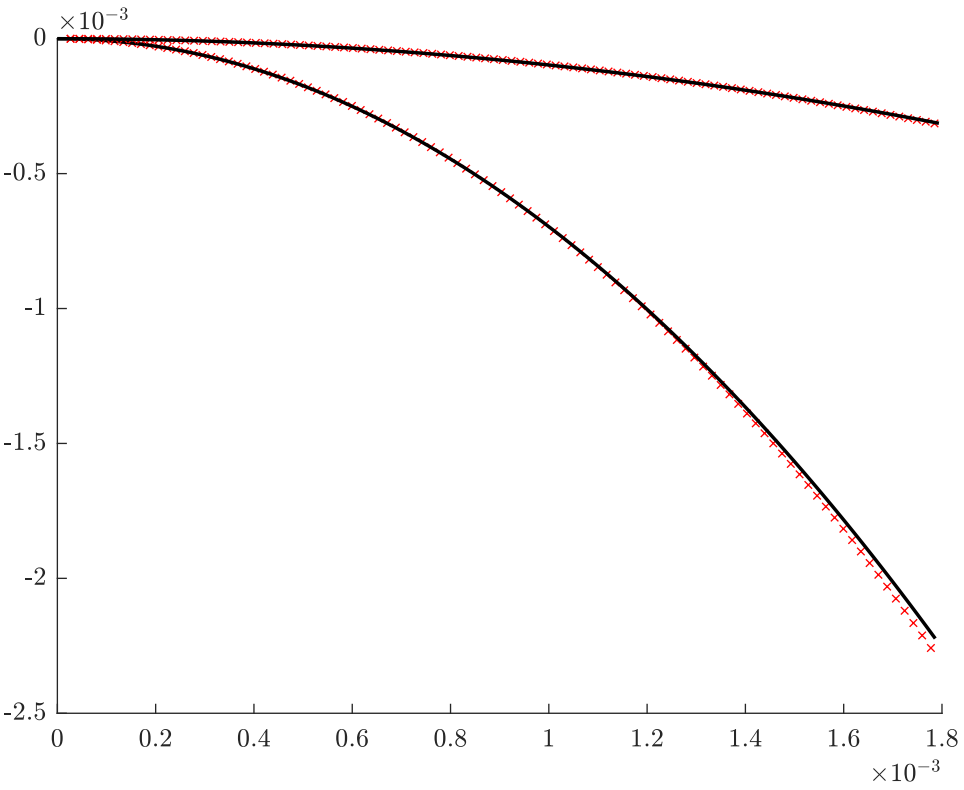

Supplement: Supplementary file 145 [file 36493543]

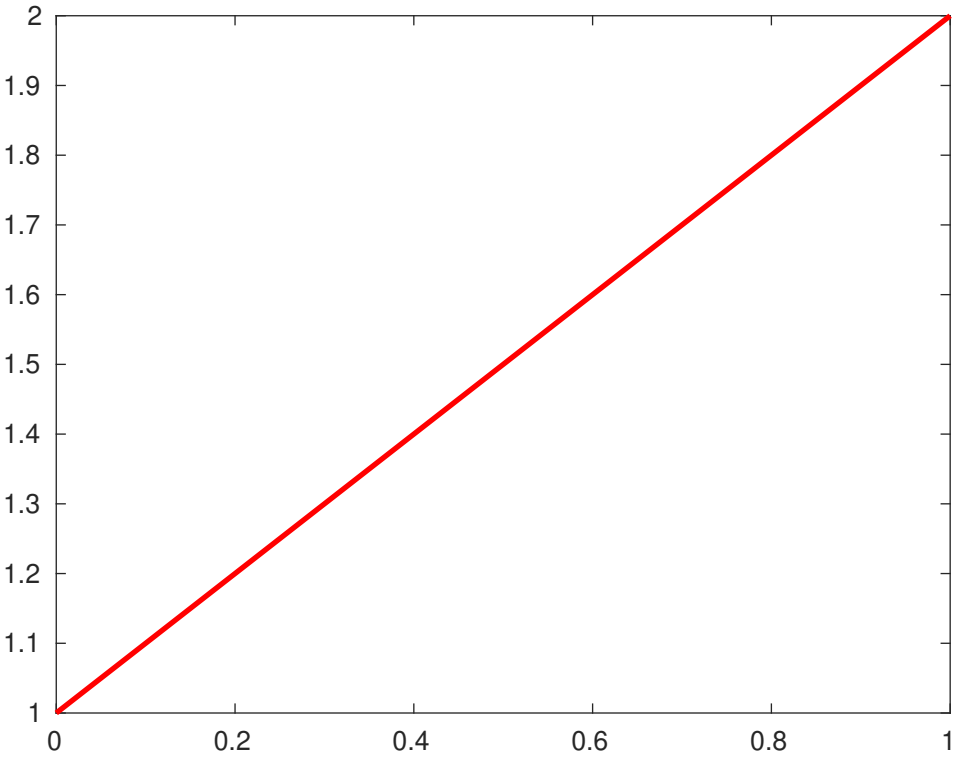

Supplement: Supplementary file 146 [file 36493543]

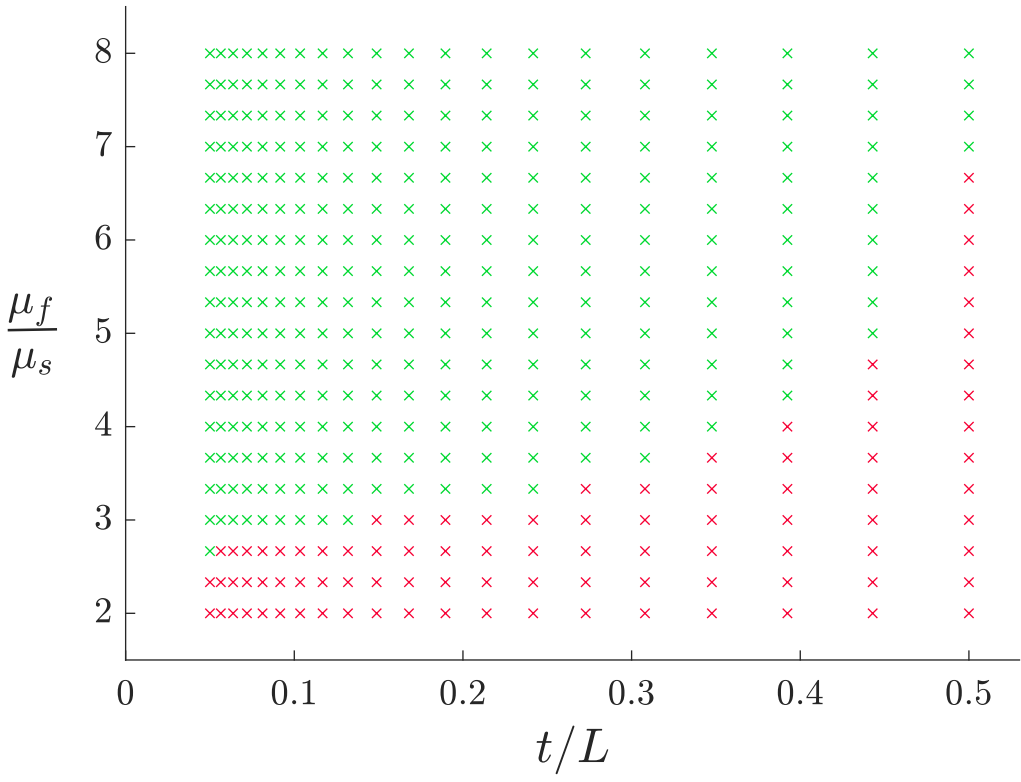

Supplement: Supplementary file 147 [file 36493543]

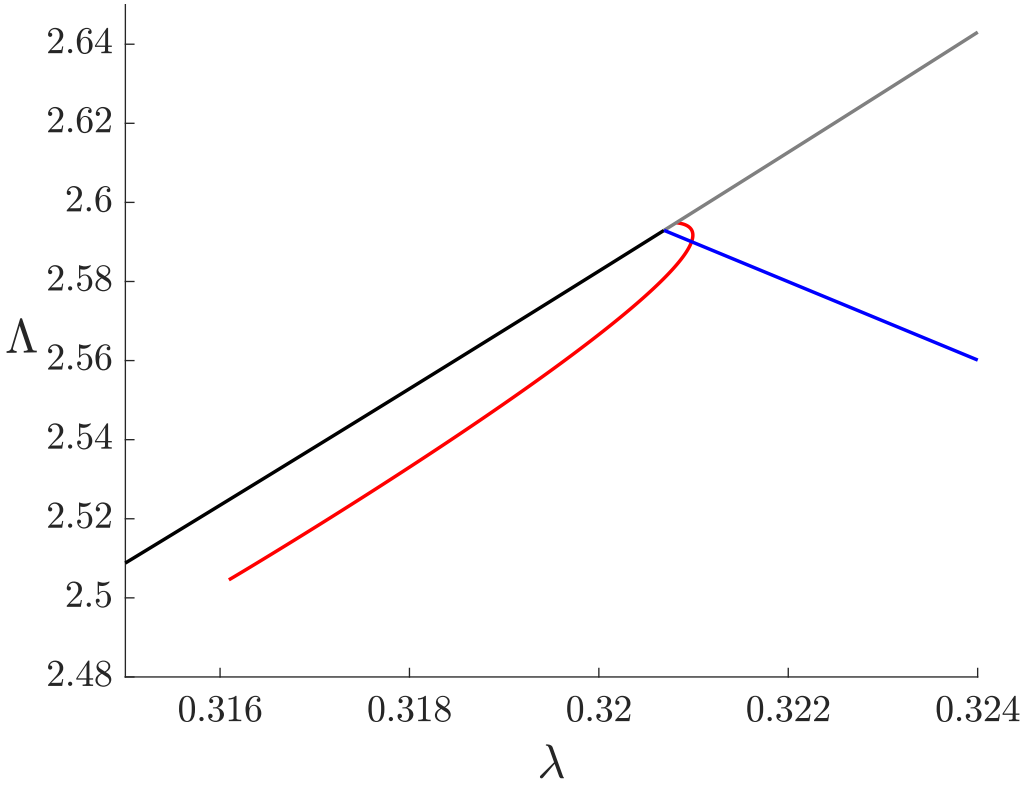

Supplement: Supplementary file 148 [file 36493543]

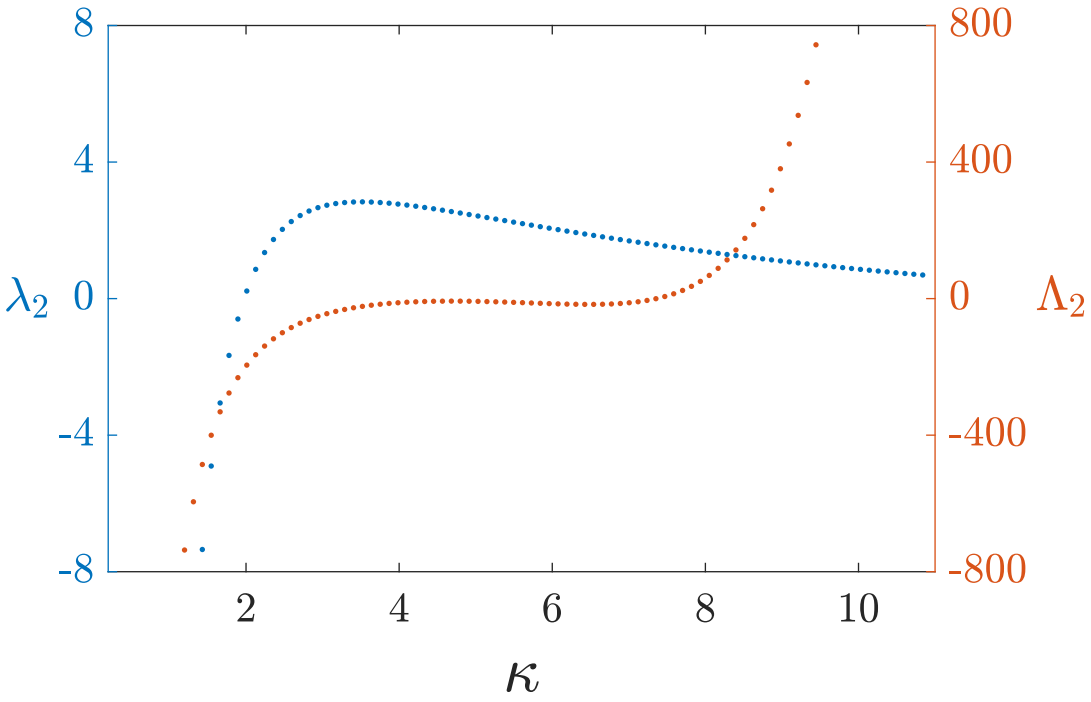

Supplement: Supplementary file 149 [file 36493543]

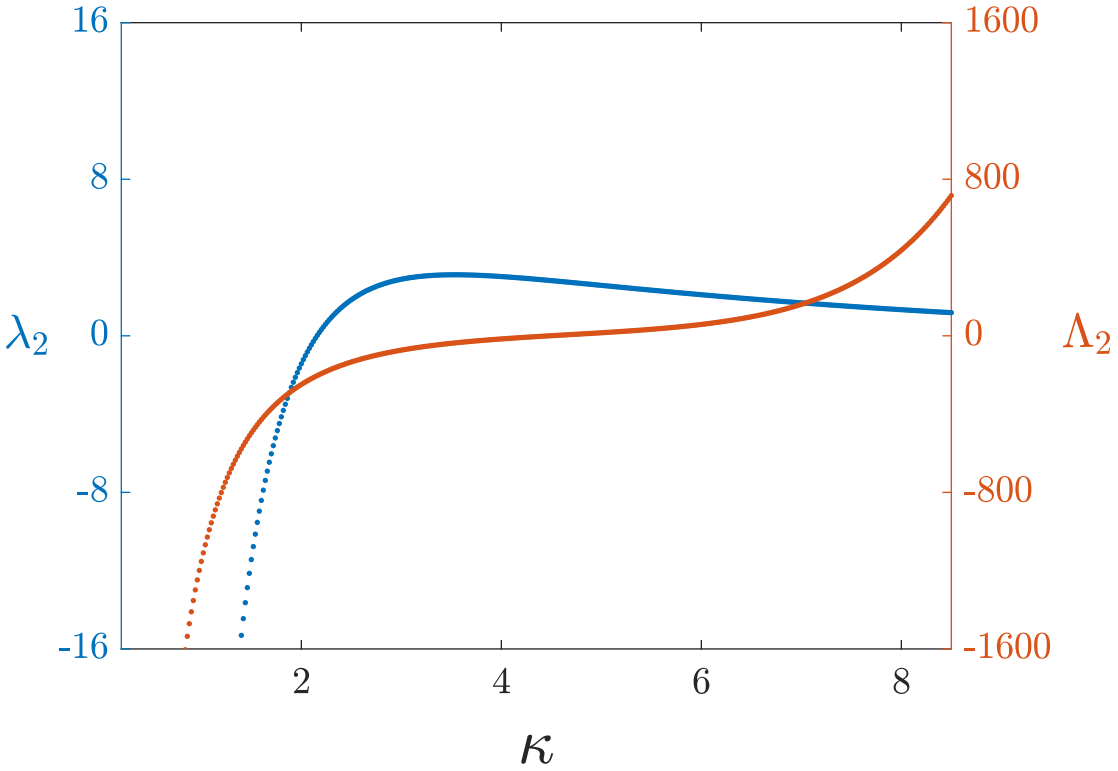

Supplement: Supplementary file 150 [file 36493543]

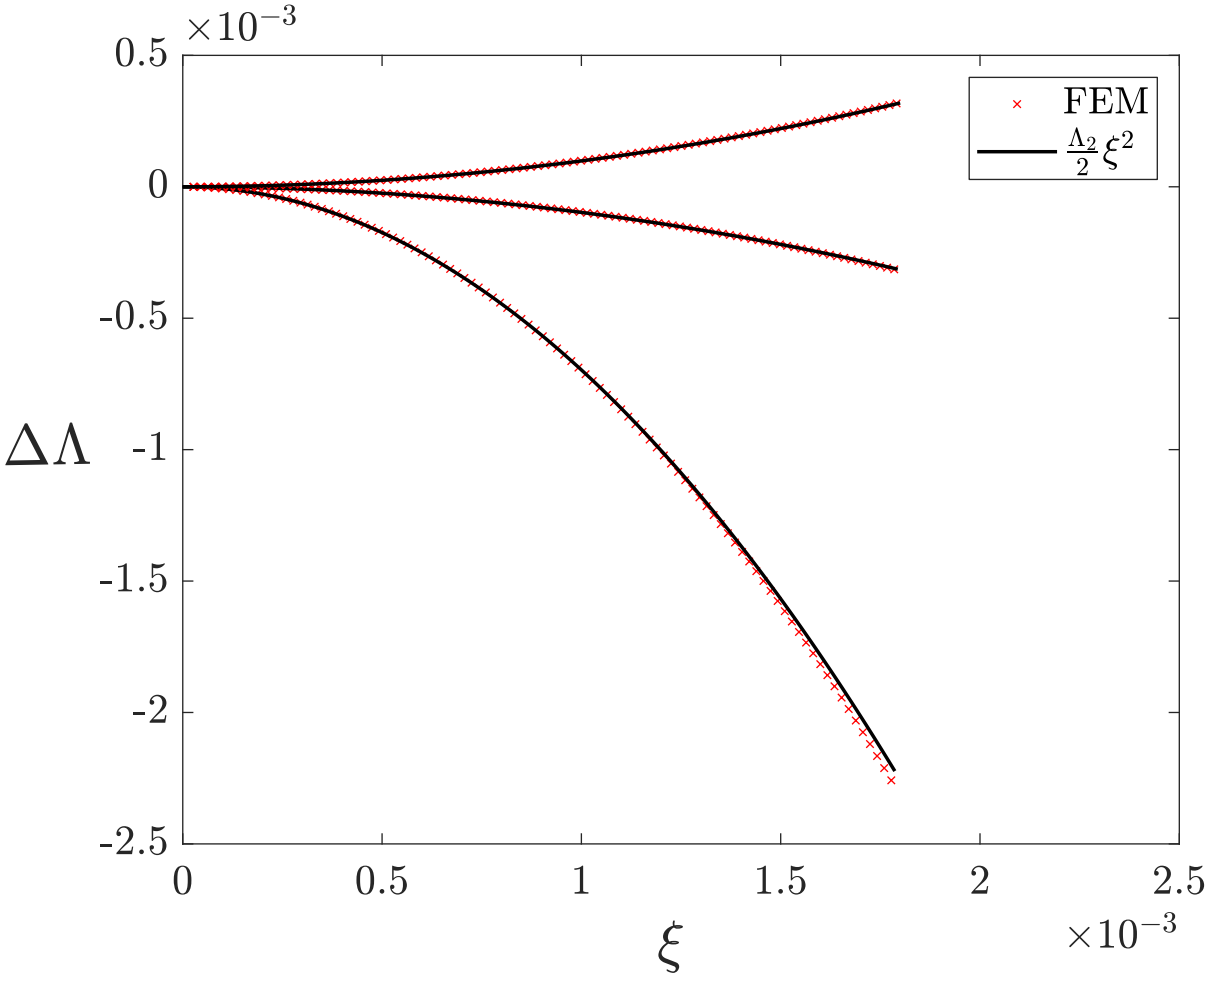

Supplement: Supplementary file 151 [file 36493543]

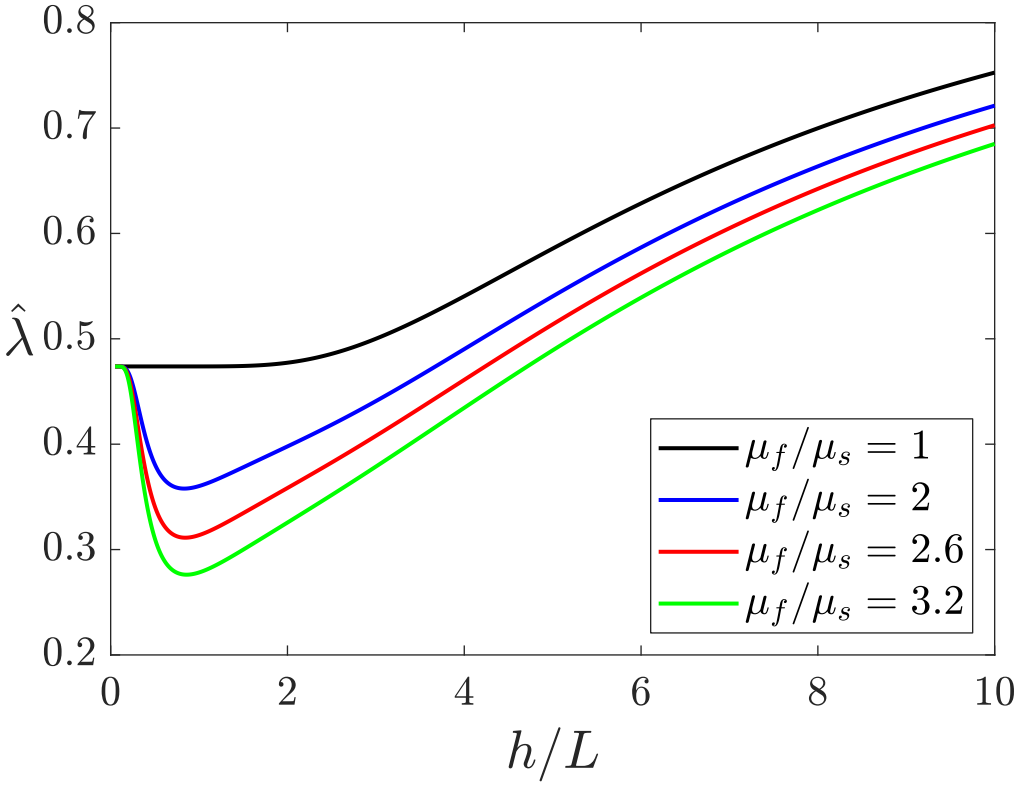

Supplement: Supplementary file 152 [file 36493543]

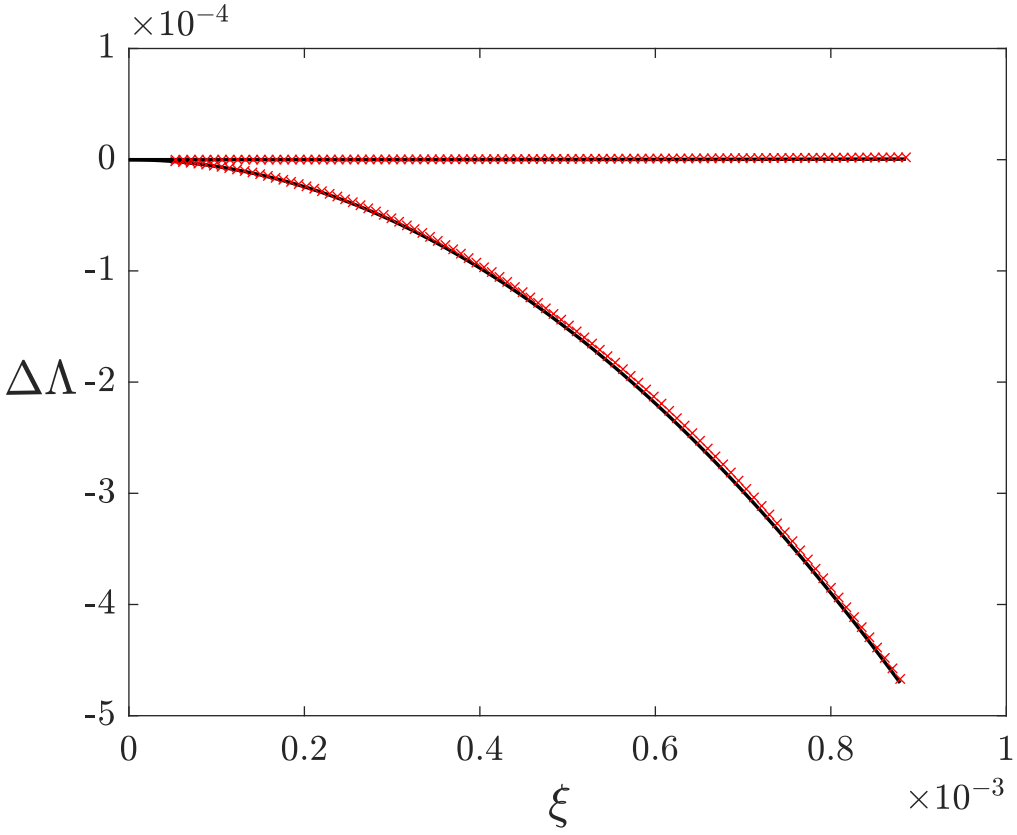

Supplement: Supplementary file 153 [file 36493543]

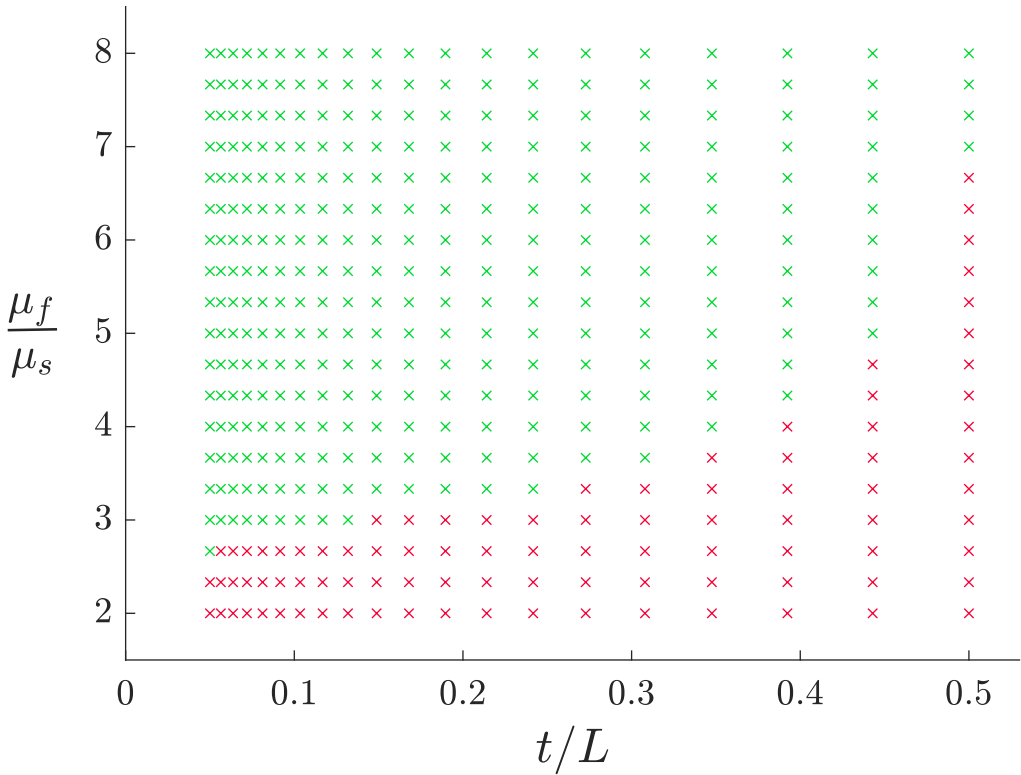

Supplement: Supplementary file 154 [file 36493543]

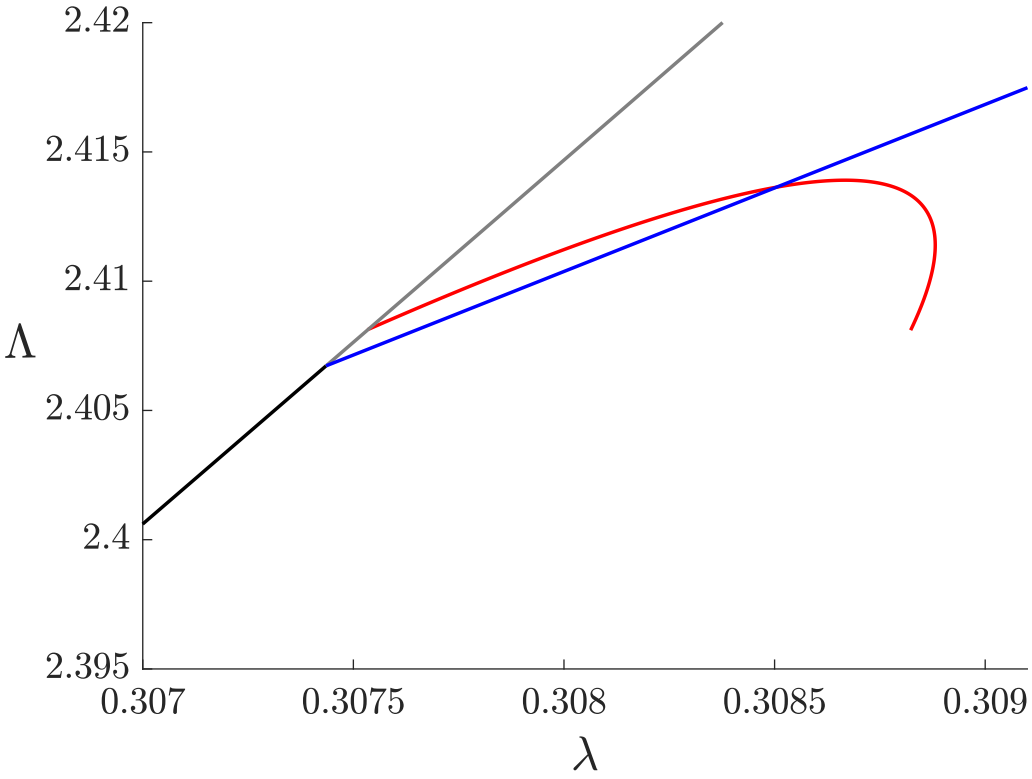

Supplement: Supplementary file 155 [file 36493543]

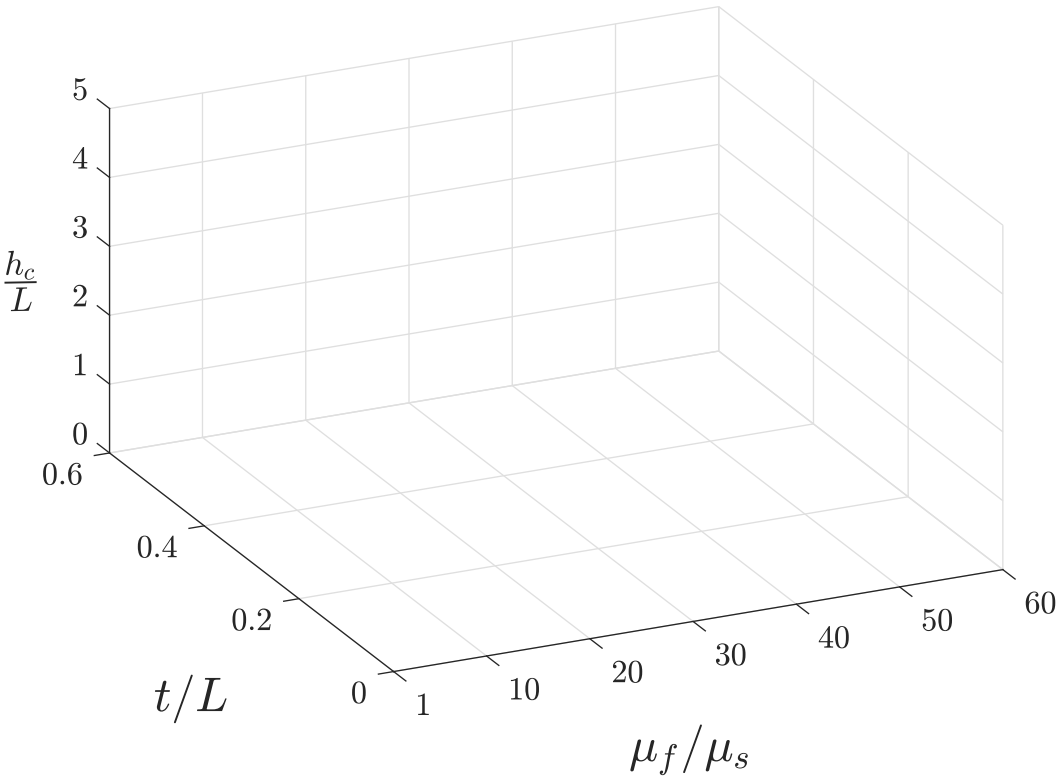

Supplement: Supplementary file 156 [file 36493543]

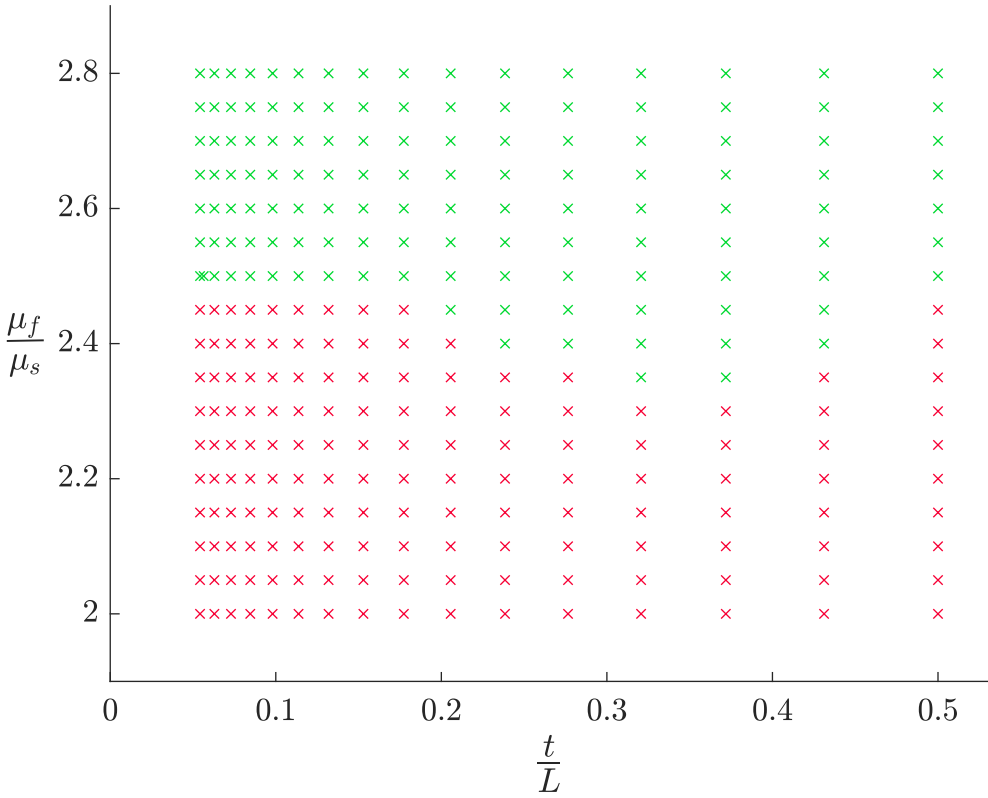

Supplement: Supplementary file 157 [file 36493543]

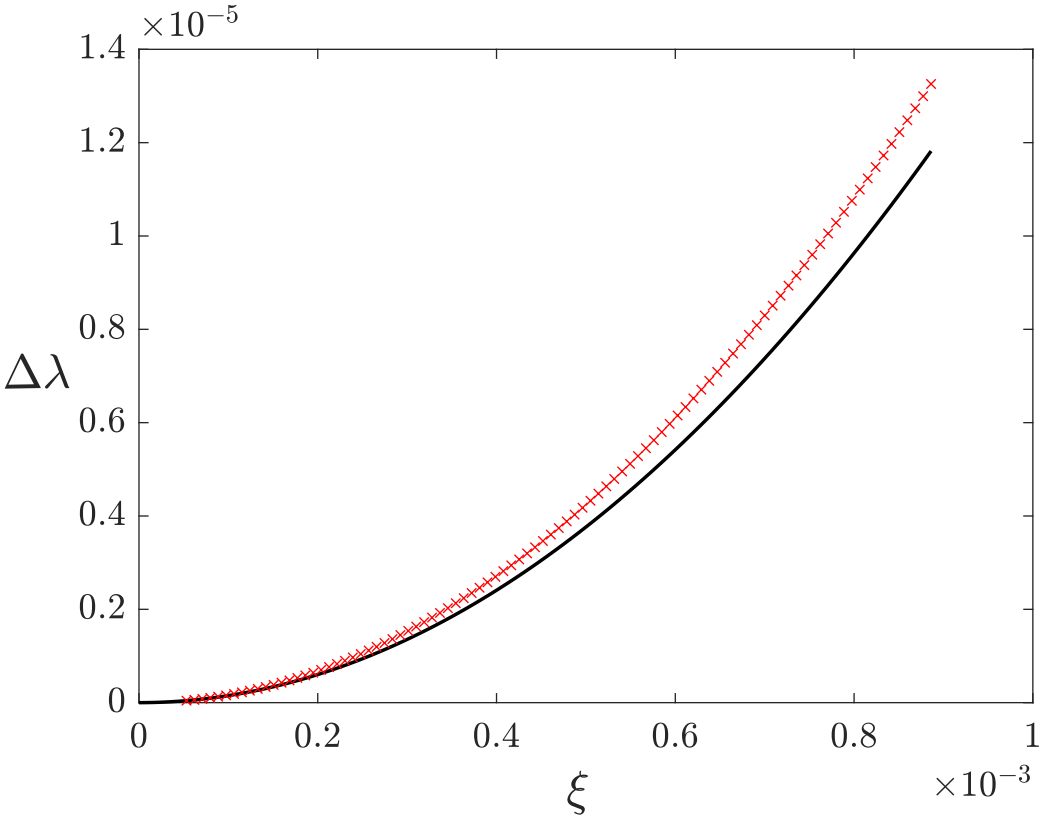

Supplement: Supplementary file 158 [file 36493543]

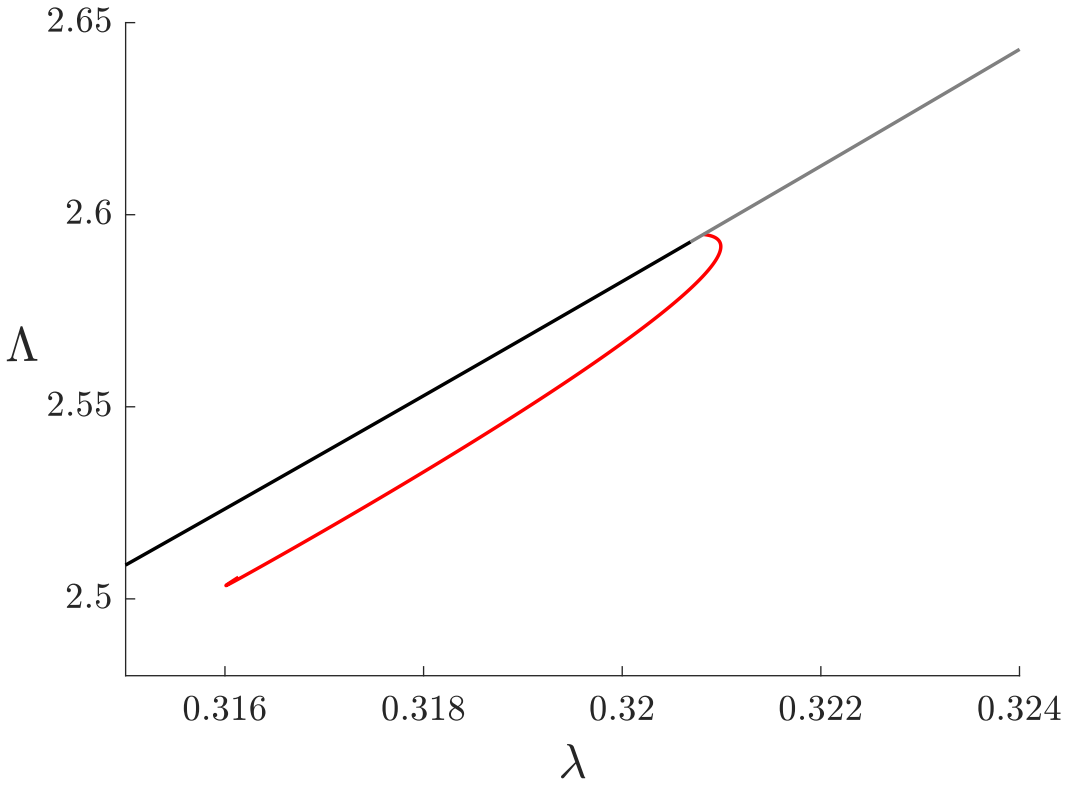

Supplement: Supplementary file 159 [file 36493543]



Supplement: Supplementary file 160 [file 36493543]

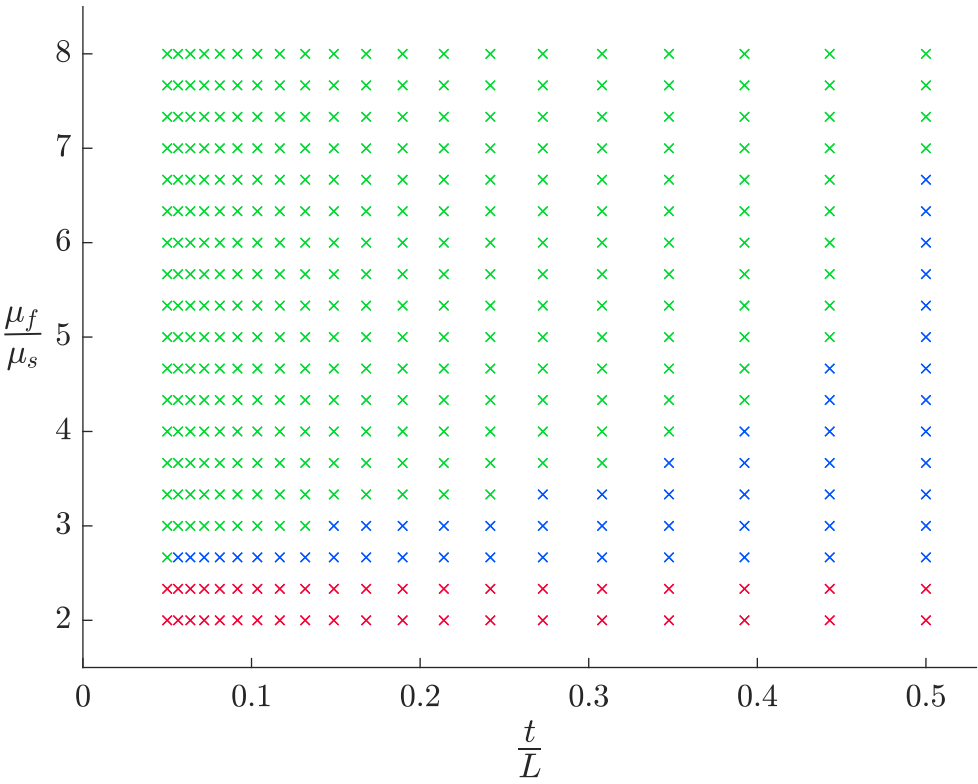

Supplement: Supplementary file 161 [file 36493543]



Supplement: Supplementary file 162 [file 36493543]
